# Supplementary material for: Networks of Gene Sharing among 329 Proteobacterial Genomes Reveal Differences in Lateral Gene Transfer Frequency at Different Phylogenetic Depths
Source: PubMed Central journal article supplement — Mol Biol Evol. 2010 Nov 8;28(2):1057–74. doi: 10.1093/molbev/msq297 (PMC3021791; doi:10.1093/molbev/msq297), 2010-11-08
Supplement: supp_msq297_mbe-10-0341-File009.pdf [file supp_msq297_mbe-10-0341-File009.pdf]

## SUPPLEMENTARY MATERIAL

|                                                                                                                                              |    |
|----------------------------------------------------------------------------------------------------------------------------------------------|----|
| Figure S1: A maximum likelihood tree of the 39 ribosomal proteins L31 sharing one protein family at $T_{60}$ . .....                         | 2  |
| Figure S2: A maximum likelihood tree of the 124 asparaginyl-tRNA synthetase proteins sharing one protein family at $T_{55}$ . .....          | 3  |
| Figure S3: Boxplots of the ancestral genome sizes calculated with the rRNA reference tree. ....                                              | 4  |
| Figure S4: Gene content reference tree of 329 proteobacterial species. ....                                                                  | 5  |
| Figure S5: Boxplots of the ancestral genome sizes calculated with the gene content reference tree. ....                                      | 6  |
| Figure S6: A minimal LGT network for 329 Proteobacteria using a gene content reference tree. ....                                            | 7  |
| Figure S7: MLN for species datasets. ....                                                                                                    | 8  |
| Figure S8. Properties of the minimal LGT networks in species scale. ....                                                                     | 9  |
| Table S1: Universal protein families at different protein identity thresholds. ....                                                          | 10 |
| Table S2: Pairs of species disconnected in $NSP_{70}$ . ....                                                                                 | 11 |
| Table S3: Class universal families at $T_{70}$ .....                                                                                         | 12 |
| Table S4: Classes, orders, species and effective genome size in the modules colored by module at different protein identity thresholds. .... | 13 |
| Table S5: Recent LGT estimated for the total Proteobacteria .....                                                                            | 17 |

SUPPLEMENTARY MATERIAL

**Figure S1: A maximum likelihood tree of the 39 ribosomal proteins L31 sharing one protein family at T<sub>60</sub>.**

Including 12 Betaproteobacteria (magenta), 20 Gammaproteobacteria (yellow), 6 Deltaproteobacteria (cyan) and the unclassified proteobacteria *Magnetococcus MC-1*. Clades containing more than one specie of the same proteobacterial class are shown collapsed.



SUPPLEMENTARY MATERIAL

**Figure S2: A maximum likelihood tree of the 124 asparaginyl-tRNA synthetase proteins sharing one proteine family at T<sub>55</sub>.**

Including 110 Gammaproteobacteria (yellow) and 14 Deltaproteobacteria (cyan). Clades containing more than one species of the same proteobacterial class are shown collapsed.



SUPPLEMENTARY MATERIAL

**Figure S3: Boxplots of the ancestral genome sizes calculated with the rRNA reference tree.**

Calculated for the whole Dataset (A), the five proteobacterial classes (B-F) and the tree species *E. coli* (G), *F. tularensis* (H) and *Y. pestis* (I) allowing different amounts of LGT.



SUPPLEMENTARY MATERIAL

**Figure S4: Gene content reference tree of 329 proteobacterial species.**

Containing 82 alphaproteobacteria (green), 52 betaproteobacteria (magenta), 157 gammaproteobacteria (yellow), 18 deltaproteobacteria (cyan), 19 epsilonproteobacteria (purple) and the unclassified proteobacteria *Magnetococcus* MC-1.



SUPPLEMENTARY MATERIAL

**Figure S5: Boxplots of the ancestral genome sizes calculated with the gene content reference tree.**

Calculated for the whole Dataset (A), the five proteobacterial classes (B-F) and the tree species *E. coli* (G), *F. tularensis* (H) and *Y. pestis* (I) allowing different amounts of LGT.



SUPPLEMENTARY MATERIAL

**Figure S6: A minimal LGT network for 329 Proteobacteria using a gene content reference tree.**

Vertical edges are indicated in gray, with both the width and the shading of the edge shown proportional to the number of inferred vertically inherited genes along the edge (see scale bar). The lateral network is indicated by edges that do not map onto the vertical component, with number of genes per edge indicated in color (see scale). The MLN showing all 61,964 edges of weight  $\geq 1$  gene in the MLN (A). The MLN showing only the 16,349 edges of weight  $\geq 5$  genes (B). The network showing only the 3,000 edges of weight  $\geq 20$  genes (C).



SUPPLEMENTARY MATERIAL

**Figure S7: MLN for species datasets.**

A minimal LGT network for the proteobacterial species *Escherichia coli* (A), *Francisella tularensis* (B) and *Yersinia pestis* (C) using a ML-reference tree and a minimal LGT network for the same species using a gene content reference tree (D-F). Vertical edges are indicated in gray, with both the width and the shading of the edge shown proportional to the number of inferred vertically inherited genes along the edge (see scale bar). The lateral network is indicated by edges that do not map onto the vertical component, with number of genes per edge indicated in color (see scale bar).





SUPPLEMENTARY MATERIAL

**Figure S8. Properties of the minimal LGT networks in species scale.**

Properties are shown for a randomly selected replicate. (A-C) Distribution of connectivity, the number of one-edge-distanced neighbors for each vertex, in the MLN. (D-F) Frequency distribution of edge weight in the lateral component of the MLN.



SUPPLEMENTARY MATERIAL

**Table S1: Universal proteome families at different proteome identity thresholds.**

| <b>Proteins</b>                                      | <b>Cutoff in %</b> | <b>25</b> | <b>30</b> | <b>35</b> | <b>40</b> | <b>45</b> | <b>50</b> | <b>55</b> | <b>60</b> | <b>65</b> | <b>70</b> |
|------------------------------------------------------|--------------------|-----------|-----------|-----------|-----------|-----------|-----------|-----------|-----------|-----------|-----------|
| ATP-dependent Clp protease, proteolytic subunit ClpP |                    | X         | X         | X         | X         | X         | X         | X         |           |           |           |
| Chaperonin GroEL                                     |                    | X         | X         | X         | X         | X         | X         |           |           |           |           |
| ATP-dependent protease ATP-binding subunit           |                    | X         | X         | X         | X         | X         |           |           |           |           |           |
| 50S ribosomal protein L2                             |                    | X         | X         | X         | X         | X         |           |           |           |           |           |
| 50S ribosomal protein L16                            |                    | X         | X         | X         | X         |           |           |           |           |           |           |
| 30S ribosomal protein S5                             |                    | X         | X         | X         | X         |           |           |           |           |           |           |
| 30S ribosomal protein S7                             |                    | X         | X         | X         |           |           |           |           |           |           |           |
| 50S ribosomal protein L5                             |                    | X         | X         | X         |           |           |           |           |           |           |           |
| 30S ribosomal protein S9                             |                    | X         | X         | X         |           |           |           |           |           |           |           |
| 50S ribosomal protein L15                            |                    | X         | X         | X         |           |           |           |           |           |           |           |
| peptide deformylase                                  |                    | x         | x         |           |           |           |           |           |           |           |           |
| 30S ribosomal protein S4                             |                    | X         | X         |           |           |           |           |           |           |           |           |
| peptide chain release factor 1                       |                    | X         | X         |           |           |           |           |           |           |           |           |
| 50S ribosomal protein L20                            |                    | X         | X         |           |           |           |           |           |           |           |           |
| DNA-directed RNA polymerase subunit alpha            |                    | X         |           |           |           |           |           |           |           |           |           |
| 50S ribosomal protein L4                             |                    | X         |           |           |           |           |           |           |           |           |           |
| 30S ribosomal protein S2                             |                    | X         |           |           |           |           |           |           |           |           |           |
| <b>Total</b>                                         |                    | <b>17</b> | <b>14</b> | <b>10</b> | <b>6</b>  | <b>4</b>  | <b>2</b>  | <b>1</b>  | <b>0</b>  | <b>0</b>  | <b>0</b>  |

Networks of gene sharing among 329 proteobacterial genomes reveal differences in lateral gene transfer frequency at different phylogenetic depths  
 Thorsten Kloesges, Ovidiu Popa, William Martin, Tal Dagan

SUPPLEMENTARY MATERIAL

Table S2: Pairs of species disconnected in NSP<sub>70</sub>

| Pairs of disconnected species at T <sub>70</sub> |                                                |
|--------------------------------------------------|------------------------------------------------|
| Anaplasma marginale St Maries                    | Zymomonas mobilis ZM4                          |
| Anaplasma marginale St Maries                    | Geobacter sulfurreducens                       |
| Anaplasma marginale St Maries                    | Syntrophus aciditrophicus SB                   |
| Anaplasma marginale St Maries                    | Campylobacter concisus 13826                   |
| Anaplasma marginale St Maries                    | Candidatus Carsonella ruddii PV                |
| Anaplasma marginale St Maries                    | Citrobacter koseri ATCC BAA-895                |
| Anaplasma marginale St Maries                    | Enterobacter sakazakii ATCC BAA-894            |
| Anaplasma marginale St Maries                    | Escherichia coli DH10B                         |
| Anaplasma marginale St Maries                    | Salmonella enterica arizonae serovar 62 z4 z23 |
| Anaplasma marginale St Maries                    | Salmonella enterica serovar Paratyphi B SPB7   |
| Anaplasma phagocytophilum HZ                     | Zymomonas mobilis ZM4                          |
| Anaplasma phagocytophilum HZ                     | Geobacter sulfurreducens                       |
| Anaplasma phagocytophilum HZ                     | Syntrophus aciditrophicus SB                   |
| Anaplasma phagocytophilum HZ                     | Campylobacter concisus 13826                   |
| Anaplasma phagocytophilum HZ                     | Candidatus Carsonella ruddii PV                |
| Anaplasma phagocytophilum HZ                     | Citrobacter koseri ATCC BAA-895                |
| Anaplasma phagocytophilum HZ                     | Enterobacter sakazakii ATCC BAA-894            |
| Anaplasma phagocytophilum HZ                     | Escherichia coli DH10B                         |
| Anaplasma phagocytophilum HZ                     | Salmonella enterica arizonae serovar 62 z4 z23 |
| Anaplasma phagocytophilum HZ                     | Salmonella enterica serovar Paratyphi B SPB7   |
| Ehrlichia canis Jake                             | Zymomonas mobilis ZM4                          |
| Ehrlichia canis Jake                             | Geobacter sulfurreducens                       |
| Ehrlichia canis Jake                             | Syntrophus aciditrophicus SB                   |
| Ehrlichia canis Jake                             | Campylobacter concisus 13826                   |
| Ehrlichia canis Jake                             | Candidatus Carsonella ruddii PV                |
| Ehrlichia canis Jake                             | Citrobacter koseri ATCC BAA-895                |
| Ehrlichia canis Jake                             | Enterobacter sakazakii ATCC BAA-894            |
| Ehrlichia canis Jake                             | Escherichia coli DH10B                         |
| Ehrlichia canis Jake                             | Salmonella enterica arizonae serovar 62 z4 z23 |
| Ehrlichia canis Jake                             | Salmonella enterica serovar Paratyphi B SPB7   |
| Ehrlichia chaffeensis Arkansas                   | Zymomonas mobilis ZM4                          |
| Ehrlichia chaffeensis Arkansas                   | Geobacter sulfurreducens                       |
| Ehrlichia chaffeensis Arkansas                   | Syntrophus aciditrophicus SB                   |
| Ehrlichia chaffeensis Arkansas                   | Campylobacter concisus 13826                   |
| Ehrlichia chaffeensis Arkansas                   | Candidatus Carsonella ruddii PV                |
| Ehrlichia chaffeensis Arkansas                   | Citrobacter koseri ATCC BAA-895                |
| Ehrlichia chaffeensis Arkansas                   | Enterobacter sakazakii ATCC BAA-894            |
| Ehrlichia chaffeensis Arkansas                   | Escherichia coli DH10B                         |
| Ehrlichia chaffeensis Arkansas                   | Salmonella enterica arizonae serovar 62 z4 z23 |
| Ehrlichia chaffeensis Arkansas                   | Salmonella enterica serovar Paratyphi B SPB7   |
| Ehrlichia ruminantium Gardel                     | Zymomonas mobilis ZM4                          |
| Ehrlichia ruminantium Gardel                     | Geobacter sulfurreducens                       |
| Ehrlichia ruminantium Gardel                     | Syntrophus aciditrophicus SB                   |
| Ehrlichia ruminantium Gardel                     | Campylobacter concisus 13826                   |
| Ehrlichia ruminantium Gardel                     | Candidatus Carsonella ruddii PV                |
| Ehrlichia ruminantium Gardel                     | Citrobacter koseri ATCC BAA-895                |
| Ehrlichia ruminantium Gardel                     | Enterobacter sakazakii ATCC BAA-894            |
| Ehrlichia ruminantium Gardel                     | Escherichia coli DH10B                         |
| Ehrlichia ruminantium Gardel                     | Salmonella enterica arizonae serovar 62 z4 z23 |
| Ehrlichia ruminantium Gardel                     | Salmonella enterica serovar Paratyphi B SPB7   |
| Ehrlichia ruminantium Welgevonden                | Zymomonas mobilis ZM4                          |
| Ehrlichia ruminantium Welgevonden                | Geobacter sulfurreducens                       |
| Ehrlichia ruminantium Welgevonden                | Syntrophus aciditrophicus SB                   |
| Ehrlichia ruminantium Welgevonden                | Campylobacter concisus 13826                   |
| Ehrlichia ruminantium Welgevonden                | Candidatus Carsonella ruddii PV                |
| Ehrlichia ruminantium Welgevonden                | Citrobacter koseri ATCC BAA-895                |
| Ehrlichia ruminantium Welgevonden                | Enterobacter sakazakii ATCC BAA-894            |
| Ehrlichia ruminantium Welgevonden                | Escherichia coli DH10B                         |
| Ehrlichia ruminantium Welgevonden                | Salmonella enterica arizonae serovar 62 z4 z23 |
| Ehrlichia ruminantium Welgevonden                | Salmonella enterica serovar Paratyphi B SPB7   |
| Ehrlichia ruminantium str. Welgevonden           | Zymomonas mobilis ZM4                          |
| Ehrlichia ruminantium str. Welgevonden           | Geobacter sulfurreducens                       |
| Ehrlichia ruminantium str. Welgevonden           | Syntrophus aciditrophicus SB                   |
| Ehrlichia ruminantium str. Welgevonden           | Campylobacter concisus 13826                   |
| Ehrlichia ruminantium str. Welgevonden           | Candidatus Carsonella ruddii PV                |
| Ehrlichia ruminantium str. Welgevonden           | Citrobacter koseri ATCC BAA-895                |
| Ehrlichia ruminantium str. Welgevonden           | Enterobacter sakazakii ATCC BAA-894            |
| Ehrlichia ruminantium str. Welgevonden           | Escherichia coli DH10B                         |
| Ehrlichia ruminantium str. Welgevonden           | Salmonella enterica arizonae serovar 62 z4 z23 |
| Ehrlichia ruminantium str. Welgevonden           | Salmonella enterica serovar Paratyphi B SPB7   |
| Neorickettsia sennetsu Miyayama                  | Candidatus Carsonella ruddii PV                |
| Neorickettsia sennetsu Miyayama                  | Citrobacter koseri ATCC BAA-895                |
| Neorickettsia sennetsu Miyayama                  | Enterobacter sakazakii ATCC BAA-894            |
| Rickettsia akari Hartford                        | Wolinella succinogenes                         |
| Rickettsia bellii OSU 85-389                     | Wolinella succinogenes                         |
| Rickettsia bellii RML369-C                       | Wolinella succinogenes                         |
| Rickettsia canadensis McKiel                     | Wolinella succinogenes                         |
| Rickettsia conorii                               | Wolinella succinogenes                         |
| Rickettsia felis URRWXC2                         | Wolinella succinogenes                         |
| Rickettsia massiliae MTU5                        | Wolinella succinogenes                         |
| Rickettsia prowazekii                            | Wolinella succinogenes                         |
| Rickettsia rickettsii Iowa                       | Wolinella succinogenes                         |
| Rickettsia rickettsii Sheila Smith               | Wolinella succinogenes                         |
| Rickettsia typhi wilmington                      | Wolinella succinogenes                         |
| Zymomonas mobilis ZM4                            | Helicobacter pylori HPAG1                      |
| Helicobacter pylori HPAG1                        | Candidatus Carsonella ruddii PV                |
| Wolinella succinogenes                           | Candidatus Carsonella ruddii PV                |

SUPPLEMENTARY MATERIAL

Table S3: Class universal families at  $T_{70}$

| class                 | proteine fam. no. | product                                                       |
|-----------------------|-------------------|---------------------------------------------------------------|
| Betaproteobacteria    | 589               | Glycine hydroxymethyltransferase                              |
| Betaproteobacteria    | 659               | GTP-binding protein LepA                                      |
| Betaproteobacteria    | 660               | 30S ribosomal protein S1                                      |
| Betaproteobacteria    | 677               | Holliday junction DNA helicase B                              |
| Betaproteobacteria    | 678               | ribosomal protein S9                                          |
| Betaproteobacteria    | 680               | 3-isopropylmalate dehydrogenase                               |
| Betaproteobacteria    | 681               | ribosomal protein L19                                         |
| Betaproteobacteria    | 682               | DNA-directed RNA polymerase subunit beta'                     |
| Betaproteobacteria    | 684               | ribosomal protein L32                                         |
| Betaproteobacteria    | 685               | bifunctional GMP synthase/glutamine amidotransferase protein  |
| Betaproteobacteria    | 686               | inosine-5'-monophosphate dehydrogenase                        |
| Betaproteobacteria    | 688               | chorismate synthase                                           |
| Betaproteobacteria    | 689               | glutathione S-transferase, N-terminal domain                  |
| Betaproteobacteria    | 690               | 30S ribosomal protein S5                                      |
| Betaproteobacteria    | 691               | 50S ribosomal protein L1                                      |
| Betaproteobacteria    | 692               | argininosuccinate lyase                                       |
| Epsilonproteobacteria | 4,506             | 50S ribosomal protein L14                                     |
| Epsilonproteobacteria | 4,513             | ATP synthase F1 sector, beta subunit                          |
| Epsilonproteobacteria | 4,531             | nucleoside diphosphate kinase                                 |
| Epsilonproteobacteria | 4,532             | 50S ribosomal protein L20                                     |
| Epsilonproteobacteria | 4,533             | DNA-dependent ATPase, RecA                                    |
| Epsilonproteobacteria | 4,534             | 30S ribosomal protein S7                                      |
| Epsilonproteobacteria | 4,535             | ribose-phosphate pyrophosphokinase                            |
| Epsilonproteobacteria | 4,536             | GTP-binding protein LepA                                      |
| Epsilonproteobacteria | 4,537             | heat shock protein HslVU, ATP-dependent protease subunit HslV |
| Epsilonproteobacteria | 4,538             | uridylyate kinase                                             |
| Epsilonproteobacteria | 4,539             | ATP synthase F1 sector, alpha subunit                         |
| Epsilonproteobacteria | 4,540             | inosine-5-monophosphate dehydrogenase                         |
| Epsilonproteobacteria | 4,541             | DnaK-type molecular chaperone                                 |
| Epsilonproteobacteria | 4,542             | riboflavin synthase, beta subunit                             |
| Epsilonproteobacteria | 4,543             | transcription termination factor Rho                          |
| Epsilonproteobacteria | 4,544             | 60 kDa chaperonin                                             |
| Epsilonproteobacteria | 4,545             | 3-oxoacyl-(acyl carrier protein) reductase                    |
| Epsilonproteobacteria | 4,546             | 50S ribosomal protein L2                                      |
| Epsilonproteobacteria | 4,547             | 30S ribosomal protein S3                                      |
| Epsilonproteobacteria | 4,548             | 50S ribosomal protein L16                                     |
| Epsilonproteobacteria | 4,549             | 30S ribosomal protein S5                                      |
| Epsilonproteobacteria | 4,550             | translation initiation factor IF-1                            |
| Epsilonproteobacteria | 4,551             | 30S ribosomal protein S13                                     |
| Epsilonproteobacteria | 4,552             | 30S ribosomal protein S11                                     |
| Epsilonproteobacteria | 4,553             | 30S ribosomal protein S4                                      |
| Epsilonproteobacteria | 4,554             | GTP-binding elongation factor family protein                  |
| Epsilonproteobacteria | 4,555             | ribonucleoside-diphosphate reductase, alpha chain             |
| Epsilonproteobacteria | 4,556             | 50S ribosomal protein L7/L12                                  |
| Epsilonproteobacteria | 4,557             | 50S ribosomal protein L11                                     |

SUPPLEMENTARY MATERIAL

Table S4: Classes, orders, species and effective genome size in the modules colored by modul at different proteine identity thresholds.

| Class               | Order               | Species                                           | EGS 30 | EGS 35 | EGS 40 | EGS 45 | EGS 50 | EGS 55 | EGS 60 | EGS 65 | EGS 70 |
|---------------------|---------------------|---------------------------------------------------|--------|--------|--------|--------|--------|--------|--------|--------|--------|
| Alphaproteobacteria | Caulobacterales     | Caulobacter K31                                   | 3867   | 3800   | 3667   | 3452   | 3228   | 2923   | 2587   | 2205   | 1812   |
| Alphaproteobacteria | Caulobacterales     | Caulobacter crescentus                            | 2987   | 2949   | 2888   | 2793   | 2659   | 2489   | 2269   | 2000   | 1695   |
| Alphaproteobacteria | Rhizobiales         | Agrobacterium tumefaciens CS8 Cereon              | 4057   | 4098   | 4076   | 3978   | 3784   | 3518   | 3150   | 2698   | 2181   |
| Alphaproteobacteria | Rhizobiales         | Azorhizobium caulinodans ORS 571                  | 3680   | 3675   | 3596   | 3479   | 3243   | 2946   | 2572   | 2155   | 1648   |
| Alphaproteobacteria | Rhizobiales         | Bartonella bacilliformis KC583                    | 1048   | 1042   | 1032   | 1022   | 1005   | 978    | 938    | 892    | 809    |
| Alphaproteobacteria | Rhizobiales         | Bartonella henselae Houston-1                     | 1293   | 1301   | 1303   | 1299   | 1293   | 1281   | 1269   | 1248   | 1211   |
| Alphaproteobacteria | Rhizobiales         | Bartonella quintana Toulouse                      | 1098   | 1106   | 1106   | 1101   | 1099   | 1091   | 1082   | 1073   | 1056   |
| Alphaproteobacteria | Rhizobiales         | Bartonella tribocorum CIP 105476                  | 1388   | 1376   | 1364   | 1341   | 1325   | 1301   | 1274   | 1232   | 1175   |
| Alphaproteobacteria | Rhizobiales         | Bradyrhizobium BTA11                              | 5630   | 5770   | 5854   | 5837   | 5813   | 5744   | 5627   | 5445   | 5243   |
| Alphaproteobacteria | Rhizobiales         | Bradyrhizobium ORS278                             | 5252   | 5403   | 5475   | 5496   | 5486   | 5464   | 5391   | 5254   | 5068   |
| Alphaproteobacteria | Rhizobiales         | Bradyrhizobium japonicum                          | 5495   | 5583   | 5553   | 5446   | 5269   | 4976   | 4595   | 4074   | 3406   |
| Alphaproteobacteria | Rhizobiales         | Brucella abortus 9-941                            | 2928   | 2970   | 3009   | 3023   | 3035   | 3042   | 3041   | 3040   | 3040   |
| Alphaproteobacteria | Rhizobiales         | Brucella canis ATCC 23365                         | 3047   | 3095   | 3134   | 3153   | 3170   | 3178   | 3180   | 3180   | 3182   |
| Alphaproteobacteria | Rhizobiales         | Brucella melitensis                               | 2888   | 2932   | 2965   | 2969   | 2976   | 2961   | 2932   | 2915   | 2881   |
| Alphaproteobacteria | Rhizobiales         | Brucella melitensis biovar Abortus                | 2880   | 2920   | 2961   | 2978   | 2992   | 3001   | 3003   | 3000   | 2999   |
| Alphaproteobacteria | Rhizobiales         | Brucella ovis                                     | 2628   | 2674   | 2704   | 2717   | 2723   | 2724   | 2725   | 2717   | 2710   |
| Alphaproteobacteria | Rhizobiales         | Brucella suis 1330                                | 3093   | 3138   | 3178   | 3197   | 3209   | 3219   | 3221   | 3219   | 3219   |
| Alphaproteobacteria | Rhizobiales         | Brucella suis ATCC 23445                          | 3038   | 3085   | 3124   | 3142   | 3157   | 3164   | 3166   | 3165   | 3167   |
| Alphaproteobacteria | Rhizobiales         | Mesorhizobium BNC1                                | 3427   | 3340   | 3228   | 2988   | 2749   | 2442   | 2107   | 1679   | 1273   |
| Alphaproteobacteria | Rhizobiales         | Mesorhizobium loti                                | 4821   | 4716   | 4578   | 4312   | 3964   | 3489   | 2980   | 2371   | 1784   |
| Alphaproteobacteria | Rhizobiales         | Methylobacterium 4 46                             | 4571   | 4575   | 4462   | 4292   | 4029   | 3668   | 3154   | 2570   | 1924   |
| Alphaproteobacteria | Rhizobiales         | Methylobacterium extorquens PA1                   | 3763   | 3780   | 3730   | 3621   | 3454   | 3224   | 2872   | 2418   | 1917   |
| Alphaproteobacteria | Rhizobiales         | Methylobacterium radiotolerans JCM 2831           | 4521   | 4530   | 4475   | 4314   | 4110   | 3797   | 3337   | 2811   | 2219   |
| Alphaproteobacteria | Rhizobiales         | Nitrobacter hamburgensis X14                      | 3184   | 3153   | 3127   | 3038   | 2962   | 2826   | 2689   | 2537   | 2352   |
| Alphaproteobacteria | Rhizobiales         | Nitrobacter winogradskyi Nb-255                   | 2554   | 2536   | 2515   | 2452   | 2409   | 2330   | 2265   | 2198   | 2100   |
| Alphaproteobacteria | Rhizobiales         | Ochrobactrum anthropi ATCC 49188                  | 3890   | 3923   | 3921   | 3853   | 3736   | 3553   | 3344   | 3150   | 2886   |
| Alphaproteobacteria | Rhizobiales         | Parvibaculum lavamentivorans DS-1                 | 2760   | 2646   | 2462   | 2184   | 1861   | 1478   | 1109   | 778    | 499    |
| Alphaproteobacteria | Rhizobiales         | Rhizobium etli CFN 42                             | 4755   | 4845   | 4897   | 4911   | 4881   | 4826   | 4769   | 4647   | 4489   |
| Alphaproteobacteria | Rhizobiales         | Rhizobium leguminosarum bv viciae 3841            | 5359   | 5456   | 5514   | 5520   | 5438   | 5309   | 5173   | 4947   | 4705   |
| Alphaproteobacteria | Rhizobiales         | Rhodopseudomonas palustris BisA53                 | 4056   | 4093   | 4062   | 4011   | 3936   | 3851   | 3694   | 3505   | 3178   |
| Alphaproteobacteria | Rhizobiales         | Rhodopseudomonas palustris BisB18                 | 4045   | 4074   | 4065   | 4028   | 3966   | 3867   | 3726   | 3507   | 3170   |
| Alphaproteobacteria | Rhizobiales         | Rhodopseudomonas palustris BisB5                  | 3858   | 3893   | 3907   | 3901   | 3869   | 3852   | 3804   | 3729   | 3604   |
| Alphaproteobacteria | Rhizobiales         | Rhodopseudomonas palustris CGA009                 | 4170   | 4230   | 4250   | 4235   | 4189   | 4110   | 3988   | 3785   | 3494   |
| Alphaproteobacteria | Rhizobiales         | Rhodopseudomonas palustris Haa2                   | 4135   | 4171   | 4182   | 4192   | 4178   | 4122   | 4065   | 3932   | 3775   |
| Alphaproteobacteria | Rhizobiales         | Sinorhizobium medicae WSM419                      | 4992   | 5068   | 5127   | 5118   | 5089   | 5043   | 4972   | 4876   | 4746   |
| Alphaproteobacteria | Rhizobiales         | Sinorhizobium meliloti                            | 4966   | 5047   | 5133   | 5163   | 5122   | 5053   | 4966   | 4865   | 4716   |
| Alphaproteobacteria | Rhizobiales         | Xanthobacter autotrophicus Py2                    | 3785   | 3747   | 3643   | 3472   | 3250   | 2930   | 2551   | 2140   | 1674   |
| Alphaproteobacteria | Rhodobacterales     | Dinoroseobacter shibae DFL 12                     | 3235   | 3182   | 3082   | 2929   | 2704   | 2426   | 2092   | 1735   | 1319   |
| Alphaproteobacteria | Rhodobacterales     | Hyphomonas neptunium ATCC 15444                   | 32515  | 2324   | 2090   | 1760   | 1383   | 1034   | 733    | 470    | 256    |
| Alphaproteobacteria | Rhodobacterales     | Jannaschia CCS1                                   | 2511   | 3147   | 2982   | 2759   | 2499   | 2193   | 1832   | 1459   | 1075   |
| Alphaproteobacteria | Rhodobacterales     | Maricaulis maris MCS10                            | 2233   | 2062   | 1821   | 1517   | 1236   | 897    | 584    | 392    | 224    |
| Alphaproteobacteria | Rhodobacterales     | Paracoccus denitrificans PD1222                   | 3646   | 3583   | 3478   | 3287   | 3020   | 2648   | 2203   | 1766   | 1289   |
| Alphaproteobacteria | Rhodobacterales     | Rhodobacter sphaeroides 2 4 1                     | 3712   | 3745   | 3787   | 3769   | 3761   | 3752   | 3730   | 3722   | 3706   |
| Alphaproteobacteria | Rhodobacterales     | Rhodobacter sphaeroides ATCC 17025                | 3488   | 3476   | 3457   | 3388   | 3337   | 3272   | 3168   | 3070   | 2957   |
| Alphaproteobacteria | Rhodobacterales     | Rhodobacter sphaeroides ATCC 17029                | 3688   | 3735   | 3794   | 3789   | 3776   | 3766   | 3738   | 3721   | 3690   |
| Alphaproteobacteria | Rhodobacterales     | Roseobacter denitrificans OCH 114                 | 3274   | 3241   | 3146   | 3013   | 2807   | 2549   | 2249   | 1905   | 1500   |
| Alphaproteobacteria | Rhodobacterales     | Silicibacter TM1040                               | 3170   | 3120   | 3029   | 2906   | 2749   | 2510   | 2244   | 1897   | 1553   |
| Alphaproteobacteria | Rhodobacterales     | Silicibacter pomeroyi DSS-3                       | 3474   | 3432   | 3344   | 3188   | 3015   | 2731   | 2408   | 2063   | 1668   |
| Alphaproteobacteria | Rhodospirillales    | Acidiphilium cryptum JF-5                         | 2600   | 2489   | 2294   | 2049   | 1752   | 1399   | 1036   | 724    | 455    |
| Alphaproteobacteria | Rhodospirillales    | Gluconacetobacter diazotrophicus PAI 5            | 2595   | 2515   | 2400   | 2172   | 1902   | 1568   | 1195   | 864    | 545    |
| Alphaproteobacteria | Rhodospirillales    | Gluconobacter oxydans 621H                        | 1925   | 1851   | 1745   | 1565   | 1368   | 1136   | 878    | 640    | 415    |
| Alphaproteobacteria | Rhodospirillales    | Granulobacter bethedensis CGDNH1                  | 1988   | 1892   | 1766   | 1581   | 1347   | 1085   | 822    | 572    | 364    |
| Alphaproteobacteria | Rhodospirillales    | Magnetospirillum magnetium AMB-1                  | 2697   | 2493   | 2229   | 1950   | 1645   | 1298   | 950    | 611    | 351    |
| Alphaproteobacteria | Rhodospirillales    | Rhodospirillum rubrum ATCC 11170                  | 2914   | 2755   | 2536   | 2294   | 1947   | 1567   | 1180   | 783    | 489    |
| Alphaproteobacteria | Rickettsiales       | Anaplasma marginale St Maries                     | 744    | 726    | 682    | 630    | 566    | 495    | 394    | 297    | 204    |
| Alphaproteobacteria | Rickettsiales       | Anaplasma phagocytophilum HZ                      | 713    | 698    | 673    | 619    | 566    | 491    | 398    | 302    | 206    |
| Alphaproteobacteria | Rickettsiales       | Candidatus Pelagibacter ubique HTCC1062           | 985    | 867    | 721    | 531    | 389    | 269    | 169    | 94     | 47     |
| Alphaproteobacteria | Rickettsiales       | Ehrlichia canis Jake                              | 796    | 789    | 783    | 771    | 764    | 752    | 738    | 725    | 698    |
| Alphaproteobacteria | Rickettsiales       | Ehrlichia chaffeensis Arkansas                    | 798    | 788    | 783    | 771    | 762    | 748    | 736    | 722    | 696    |
| Alphaproteobacteria | Rickettsiales       | Ehrlichia ruminantium Gardel                      | 919    | 920    | 920    | 917    | 914    | 913    | 912    | 909    | 905    |
| Alphaproteobacteria | Rickettsiales       | Ehrlichia ruminantium Weigelvonden                | 883    | 884    | 884    | 884    | 884    | 883    | 884    | 882    | 882    |
| Alphaproteobacteria | Rickettsiales       | Ehrlichia ruminantium str. Weigelvonden           | 921    | 923    | 923    | 924    | 924    | 922    | 917    | 916    | 915    |
| Alphaproteobacteria | Rickettsiales       | Neorickettsia sennetsu Miyayama                   | 529    | 459    | 361    | 270    | 186    | 98     | 60     | 29     | 10     |
| Alphaproteobacteria | Rickettsiales       | Orientia tsutsugamushi Borjong                    | 573    | 525    | 465    | 380    | 303    | 190    | 123    | 61     | 30     |
| Alphaproteobacteria | Rickettsiales       | Rickettsia akari Hartford                         | 1002   | 983    | 969    | 952    | 921    | 894    | 877    | 854    | 841    |
| Alphaproteobacteria | Rickettsiales       | Rickettsia bellii OSU 85-389                      | 1279   | 1282   | 1279   | 1274   | 1272   | 1260   | 1244   | 1230   | 1213   |
| Alphaproteobacteria | Rickettsiales       | Rickettsia bellii RML369-C                        | 1310   | 1311   | 1309   | 1301   | 1294   | 1283   | 1267   | 1254   | 1228   |
| Alphaproteobacteria | Rickettsiales       | Rickettsia canadensis McKiel                      | 840    | 829    | 822    | 816    | 807    | 803    | 787    | 775    | 769    |
| Alphaproteobacteria | Rickettsiales       | Rickettsia conorii                                | 1231   | 1211   | 1185   | 1169   | 1139   | 1113   | 1089   | 1060   | 1033   |
| Alphaproteobacteria | Rickettsiales       | Rickettsia felis URWXCai2                         | 1189   | 1158   | 1114   | 1084   | 1054   | 1018   | 980    | 961    | 937    |
| Alphaproteobacteria | Rickettsiales       | Rickettsia massiliae MTU5                         | 948    | 942    | 935    | 930    | 924    | 917    | 903    | 889    | 881    |
| Alphaproteobacteria | Rickettsiales       | Rickettsia prowazekii                             | 802    | 803    | 800    | 800    | 800    | 797    | 794    | 794    | 788    |
| Alphaproteobacteria | Rickettsiales       | Rickettsia rickettsii Iowa                        | 1286   | 1281   | 1275   | 1272   | 1268   | 1264   | 1254   | 1246   | 1241   |
| Alphaproteobacteria | Rickettsiales       | Rickettsia rickettsii Sheila Smith                | 1271   | 1271   | 1271   | 1267   | 1263   | 1258   | 1256   | 1249   | 1246   |
| Alphaproteobacteria | Rickettsiales       | Rickettsia typhi wilmington                       | 811    | 813    | 812    | 812    | 812    | 807    | 805    | 806    | 801    |
| Alphaproteobacteria | Rickettsiales       | Wolbachia endosymbiont of Brugia malayi TRS       | 669    | 664    | 657    | 651    | 645    | 633    | 629    | 619    | 597    |
| Alphaproteobacteria | Rickettsiales       | Wolbachia endosymbiont of Drosophila melanogaster | 774    | 749    | 724    | 710    | 682    | 658    | 640    | 623    | 599    |
| Alphaproteobacteria | Sphingomonadales    | Erythrobacter litoralis HTCC2594                  | 2271   | 2193   | 2070   | 1889   | 1670   | 1433   | 1142   | 876    | 617    |
| Alphaproteobacteria | Sphingomonadales    | Novosphingobium aromaticivorans DSM 12444         | 2919   | 2802   | 2627   | 2402   | 2118   | 1799   | 1444   | 1112   | 780    |
| Alphaproteobacteria | Sphingomonadales    | Sphingomonas wittichii RW1                        | 3472   | 3280   | 3023   | 2652   | 2269   | 1879   | 1477   | 1083   | 721    |
| Alphaproteobacteria | Sphingomonadales    | Sphingopyxis alaskensis RB2256                    | 2558   | 2492   | 2340   | 2118   | 1880   | 1578   | 1251   | 972    | 670    |
| Alphaproteobacteria | Sphingomonadales    | Zymomonas mobilis ZM4                             | 1434   | 1357   | 1248   | 1104   | 962    | 782    | 593    | 406    | 262    |
| Deltaproteobacteria | Bdellovibrionales   | Bdellovibrio bacteriovorus                        | 1412   | 1157   | 927    | 664    | 443    | 277    | 164    | 82     | 41     |
| Deltaproteobacteria | Desulfobacterales   | Candidatus Desulfococcus oleovorans Hxd3          | 1887   | 1672   | 1428   | 1129   | 851    | 581    | 344    | 183    | 90     |
| Deltaproteobacteria | Desulfobacterales   | Desulfotalea psychrophila L5v4                    | 1885   | 1697   | 1448   | 1137   | 859    | 573    | 374    | 212    | 110    |
| Deltaproteobacteria | Desulfovibrionales  | Desulfovibrio desulfuricans G20                   | 2465   | 2328   | 2166   | 1938   | 1705   | 1458   | 1196   | 913    | 688    |
| Deltaproteobacteria | Desulfovibrionales  | Desulfovibrio vulgaris DP4                        | 2801   | 2816   | 2821   | 2807   | 2792   | 2774   | 2769   | 2761   | 2742   |
| Deltaproteobacteria | Desulfovibrionales  | Desulfovibrio vulgaris Hildenborough              | 2804   | 2827   | 2827   | 2825   | 2805   | 2786   | 2776   | 2763   | 2748   |
| Deltaproteobacteria | Desulfuromonadales  | Lawsonia intracellularis PHE MN1-00               | 1020   | 943    | 829    | 703    | 572    | 466    | 340    | 209    | 115    |
| Deltaproteobacteria | Desulfuromonadales  | Geobacter metallireducens GS-15                   | 2813   | 2772   | 2720   | 2615   | 2497   | 2355   | 2194   | 1955   | 1692   |
| Deltaproteobacteria | Desulfuromonadales  | Geobacter sulfurireducens                         | 2745   | 2704   | 2661   | 2558   | 2453   | 2288   | 2116   | 1897   | 1645   |
| Deltaproteobacteria | Desulfuromonadales  | Geobacter uraniumreducens Rf4                     | 3081   | 2980   | 2816   | 2662   | 2475   | 2221   | 1915   | 1596   | 1243   |
| Deltaproteobacteria | Desulfuromonadales  | Pelobacter carbinolicus                           | 2237   | 2061   | 1853   | 1593   | 1310   | 1003   | 730    | 492    | 290    |
| Deltaproteobacteria | Desulfuromonadales  | Pelobacter propionicus DSM 2379                   | 2601   | 2501   | 2320   | 2133   | 1882   | 1613   | 1331   | 1022   | 742    |
| Deltaproteobacteria | Mycococcales        | Anaeromyxobacter Fw109-5                          | 3462   | 3391   | 3300   | 3130   | 2919   | 2690   | 2460   | 2094   | 1678   |
| Deltaproteobacteria | Mycococcales        | Anaeromyxobacter dehalogenans 2CP-C               | 3424   | 3352   | 3255   | 3114   | 2920   | 2691   | 2458   | 2103   | 1682   |
| Deltaproteobacteria | Mycococcales        | Mycococcus xanthus DK 1622                        | 3352   | 2986   | 2520   | 2019   | 1528   | 1079   | 722    | 416    | 224    |
| Deltaproteobacteria | Mycococcales        | Sorangium cellulosum So ce 56                     | 3318   | 2805   | 2249   | 1723   | 1259   | 845    | 516    | 268    | 138    |
| Deltaproteobacteria | Syntrophobacterales | Syntrophobacter fumarolicus MPOB                  | 2335   | 2090   | 1839   | 1511   | 1134   | 788    | 509    | 302    | 187    |
| Deltaproteobacteria | Syntrophobacterales | Syntrophus aciditrophicus SB                      | 1766   | 1591   | 1357   | 1110   | 850    | 596    | 390    | 229    | 131    |

Networks of gene sharing among 329 proteobacterial genomes reveal differences in lateral gene transfer frequency at different phylogenetic depths  
 Thorsten Kloesges, Ovidiu Popa, William Martin, Tal Dagan

SUPPLEMENTARY MATERIAL

|                       |                    |                                                     |      |      |      |      |      |      |      |      |      |
|-----------------------|--------------------|-----------------------------------------------------|------|------|------|------|------|------|------|------|------|
| Epsilonproteobacteria | Campylobacteriales | <i>Arcobacter butzleri</i> RM4018                   | 1624 | 1506 | 1334 | 1140 | 931  | 719  | 542  | 356  | 214  |
| Epsilonproteobacteria | Campylobacteriales | <i>Campylobacter concisus</i> 13826                 | 1510 | 1482 | 1443 | 1395 | 1327 | 1243 | 1140 | 1027 | 866  |
| Epsilonproteobacteria | Campylobacteriales | <i>Campylobacter curvus</i> 525 92                  | 1568 | 1550 | 1516 | 1453 | 1376 | 1276 | 1158 | 1038 | 872  |
| Epsilonproteobacteria | Campylobacteriales | <i>Campylobacter fetus</i> 82-40                    | 1449 | 1399 | 1313 | 1218 | 1097 | 921  | 736  | 558  | 410  |
| Epsilonproteobacteria | Campylobacteriales | <i>Campylobacter hominis</i> ATCC BAA-381           | 1168 | 1127 | 1055 | 959  | 871  | 725  | 579  | 423  | 303  |
| Epsilonproteobacteria | Campylobacteriales | <i>Campylobacter jejuni</i>                         | 1550 | 1553 | 1556 | 1552 | 1553 | 1547 | 1549 | 1546 | 1539 |
| Epsilonproteobacteria | Campylobacteriales | <i>Campylobacter jejuni</i> 81-176                  | 1585 | 1591 | 1581 | 1565 | 1563 | 1551 | 1541 | 1532 | 1521 |
| Epsilonproteobacteria | Campylobacteriales | <i>Campylobacter jejuni</i> 81116                   | 1537 | 1543 | 1542 | 1539 | 1537 | 1527 | 1523 | 1510 | 1502 |
| Epsilonproteobacteria | Campylobacteriales | <i>Campylobacter jejuni</i> RM1221                  | 1592 | 1585 | 1577 | 1569 | 1568 | 1559 | 1553 | 1542 | 1537 |
| Epsilonproteobacteria | Campylobacteriales | <i>Campylobacter jejuni</i> doylei 269 97           | 1469 | 1463 | 1455 | 1447 | 1425 | 1411 | 1397 | 1384 | 1373 |
| Epsilonproteobacteria | Campylobacteriales | <i>Helicobacter acinonychis</i> Sheeba              | 1295 | 1296 | 1282 | 1262 | 1252 | 1241 | 1237 | 1223 | 1209 |
| Epsilonproteobacteria | Campylobacteriales | <i>Helicobacter hepaticus</i>                       | 1279 | 1180 | 1048 | 901  | 745  | 584  | 439  | 297  | 209  |
| Epsilonproteobacteria | Campylobacteriales | <i>Helicobacter pylori</i> 26695                    | 1417 | 1420 | 1418 | 1408 | 1400 | 1389 | 1378 | 1363 | 1344 |
| Epsilonproteobacteria | Campylobacteriales | <i>Helicobacter pylori</i> HPAG1                    | 1415 | 1416 | 1412 | 1401 | 1395 | 1382 | 1374 | 1371 | 1356 |
| Epsilonproteobacteria | Campylobacteriales | <i>Helicobacter pylori</i> J99                      | 1417 | 1418 | 1412 | 1405 | 1393 | 1385 | 1378 | 1370 | 1362 |
| Epsilonproteobacteria | Campylobacteriales | <i>Thiomicrospira denitrificans</i> ATCC 33889      | 1619 | 1515 | 1366 | 1202 | 1012 | 795  | 600  | 413  | 260  |
| Epsilonproteobacteria | Campylobacteriales | <i>Wolinella succinogenes</i>                       | 1615 | 1494 | 1337 | 1137 | 934  | 741  | 546  | 359  | 233  |
| Epsilonproteobacteria | Nitratiruptor      | <i>Nitratiruptor</i> SB155-2                        | 1427 | 1315 | 1194 | 1060 | 903  | 722  | 545  | 386  | 228  |
| Epsilonproteobacteria | Sulfurovum         | <i>Sulfurovum</i> NBC37-1                           | 1704 | 1558 | 1413 | 1234 | 1012 | 810  | 612  | 421  | 252  |
| Betaproteobacteria    | Burkholderiales    | <i>Acidovorax</i> JS42                              | 3336 | 3326 | 3315 | 3270 | 3191 | 3056 | 2860 | 2591 | 2240 |
| Betaproteobacteria    | Burkholderiales    | <i>Acidovorax</i> avenae citrulli AACD0-1           | 3303 | 3549 | 3484 | 3381 | 3227 | 3034 | 2763 | 2454 | 2076 |
| Betaproteobacteria    | Burkholderiales    | <i>Bordetella bronchiseptica</i>                    | 4041 | 4168 | 4252 | 4346 | 4382 | 4389 | 4405 | 4400 | 4384 |
| Betaproteobacteria    | Burkholderiales    | <i>Bordetella parapertussis</i>                     | 3585 | 3717 | 3804 | 3912 | 3970 | 4017 | 4057 | 4071 | 4082 |
| Betaproteobacteria    | Burkholderiales    | <i>Bordetella pertussis</i>                         | 2900 | 2967 | 3023 | 3065 | 3093 | 3115 | 3132 | 3136 | 3138 |
| Betaproteobacteria    | Burkholderiales    | <i>Bordetella petrii</i>                            | 3720 | 3752 | 3764 | 3714 | 3594 | 3375 | 3114 | 2791 | 2440 |
| Betaproteobacteria    | Burkholderiales    | <i>Burkholderia</i> 383                             | 5820 | 5986 | 6137 | 6224 | 6236 | 6199 | 6085 | 5952 | 5819 |
| Betaproteobacteria    | Burkholderiales    | <i>Burkholderia</i> cenocepacia AU 1054             | 5472 | 5668 | 5860 | 5998 | 6092 | 6182 | 6229 | 6268 | 6302 |
| Betaproteobacteria    | Burkholderiales    | <i>Burkholderia</i> cenocepacia HI2424              | 5724 | 5934 | 6126 | 6275 | 6363 | 6452 | 6495 | 6535 | 6564 |
| Betaproteobacteria    | Burkholderiales    | <i>Burkholderia</i> cenocepacia MCO 3               | 5696 | 5884 | 6073 | 6198 | 6253 | 6313 | 6312 | 6314 | 6303 |
| Betaproteobacteria    | Burkholderiales    | <i>Burkholderia</i> cepacia AMMD                    | 5282 | 5422 | 5567 | 5647 | 5683 | 5692 | 5668 | 5607 | 5537 |
| Betaproteobacteria    | Burkholderiales    | <i>Burkholderia</i> mallei ATCC 23344               | 4153 | 4215 | 4273 | 4312 | 4329 | 4340 | 4329 | 4336 | 4318 |
| Betaproteobacteria    | Burkholderiales    | <i>Burkholderia</i> mallei NCTC 10229               | 4896 | 4969 | 5035 | 5080 | 5102 | 5129 | 5134 | 5144 | 5139 |
| Betaproteobacteria    | Burkholderiales    | <i>Burkholderia</i> mallei NCTC 10247               | 5198 | 5267 | 5340 | 5389 | 5411 | 5441 | 5443 | 5456 | 5456 |
| Betaproteobacteria    | Burkholderiales    | <i>Burkholderia</i> mallei SAVP1                    | 4628 | 4682 | 4744 | 4780 | 4794 | 4814 | 4822 | 4834 | 4824 |
| Betaproteobacteria    | Burkholderiales    | <i>Burkholderia</i> multivorans ATCC 17616          | 5000 | 5128 | 5234 | 5280 | 5316 | 5304 | 5271 | 5196 | 5094 |
| Betaproteobacteria    | Burkholderiales    | <i>Burkholderia</i> pseudomallei 1106a              | 6176 | 6273 | 6356 | 6411 | 6434 | 6460 | 6459 | 6451 | 6420 |
| Betaproteobacteria    | Burkholderiales    | <i>Burkholderia</i> pseudomallei 1710b              | 5056 | 5138 | 5217 | 5261 | 5291 | 5316 | 5303 | 5294 | 5263 |
| Betaproteobacteria    | Burkholderiales    | <i>Burkholderia</i> pseudomallei 668                | 6117 | 6207 | 6283 | 6340 | 6366 | 6381 | 6367 | 6338 | 6310 |
| Betaproteobacteria    | Burkholderiales    | <i>Burkholderia</i> pseudomallei K96243             | 5049 | 5154 | 5248 | 5316 | 5349 | 5389 | 5404 | 5413 | 5410 |
| Betaproteobacteria    | Burkholderiales    | <i>Burkholderia</i> thailandensis E264              | 4706 | 4780 | 4846 | 4873 | 4882 | 4876 | 4827 | 4775 | 4693 |
| Betaproteobacteria    | Burkholderiales    | <i>Burkholderia</i> vietnamiensis G4                | 5340 | 5397 | 5453 | 5461 | 5426 | 5386 | 5293 | 5204 | 5083 |
| Betaproteobacteria    | Burkholderiales    | <i>Burkholderia</i> xenovorans LB400                | 5448 | 5512 | 5495 | 5306 | 5068 | 4732 | 4343 | 3800 | 3225 |
| Betaproteobacteria    | Burkholderiales    | <i>Deltaia acidovorans</i> SPH-1                    | 4475 | 4490 | 4423 | 4264 | 4022 | 3694 | 3270 | 2750 | 2209 |
| Betaproteobacteria    | Burkholderiales    | <i>Herrnlimonas arsenicoxydans</i>                  | 2728 | 2726 | 2698 | 2643 | 2576 | 2499 | 2397 | 2271 | 2111 |
| Betaproteobacteria    | Burkholderiales    | <i>Janthinobacterium</i> Marseille                  | 3077 | 3077 | 3034 | 2954 | 2838 | 2712 | 2557 | 2368 | 2157 |
| Betaproteobacteria    | Burkholderiales    | <i>Leptothrix cholodnii</i> SP 6                    | 3416 | 3339 | 3218 | 3041 | 2819 | 2525 | 2133 | 1726 | 1301 |
| Betaproteobacteria    | Burkholderiales    | <i>Methylubium petroleiphilum</i> PM1               | 3282 | 3197 | 3101 | 2914 | 2675 | 2416 | 2036 | 1647 | 1224 |
| Betaproteobacteria    | Burkholderiales    | <i>Polaromonas</i> JS666                            | 4006 | 4016 | 4008 | 3894 | 3712 | 3475 | 3237 | 2884 | 2507 |
| Betaproteobacteria    | Burkholderiales    | <i>Polaromonas</i> naphthalenivorans CJ2            | 3730 | 3691 | 3632 | 3532 | 3410 | 3219 | 2976 | 2725 | 2421 |
| Betaproteobacteria    | Burkholderiales    | <i>Polynucleobacter</i> QLW-P1DMWA-1                | 1799 | 1755 | 1707 | 1626 | 1533 | 1447 | 1341 | 1231 | 1115 |
| Betaproteobacteria    | Burkholderiales    | <i>Polynucleobacter</i> necessarius ST1R1           | 1229 | 1208 | 1184 | 1168 | 1137 | 1116 | 1098 | 1061 | 1005 |
| Betaproteobacteria    | Burkholderiales    | <i>Ralstonia eutropha</i> H16                       | 5138 | 5207 | 5253 | 5254 | 5193 | 5037 | 4829 | 4549 | 4177 |
| Betaproteobacteria    | Burkholderiales    | <i>Ralstonia eutropha</i> JMP134                    | 5072 | 5136 | 5172 | 5196 | 5126 | 4985 | 4788 | 4530 | 4155 |
| Betaproteobacteria    | Burkholderiales    | <i>Ralstonia</i> metallidurans CH34                 | 4809 | 4846 | 4858 | 4831 | 4734 | 4547 | 4274 | 3953 | 3563 |
| Betaproteobacteria    | Burkholderiales    | <i>Ralstonia</i> solanaceorum                       | 3798 | 3733 | 3676 | 3533 | 3290 | 2997 | 2602 | 2187 | 1754 |
| Betaproteobacteria    | Burkholderiales    | <i>Rhodoferrax</i> ferrireducens T118               | 3495 | 3447 | 3361 | 3247 | 3048 | 2800 | 2473 | 2095 | 1650 |
| Betaproteobacteria    | Burkholderiales    | <i>Verminephrobacter</i> eiseniae EF01-2            | 3778 | 3578 | 3514 | 3405 | 3238 | 2953 | 2645 | 2260 | 1772 |
| Betaproteobacteria    | Hydrogenophiales   | <i>Thiobacillus denitrificans</i> ATCC 25259        | 2523 | 2160 | 2031 | 1844 | 1615 | 1318 | 1017 | 723  | 459  |
| Betaproteobacteria    | Methylophilales    | <i>Methylobacillus</i> flagellatus KT               | 2118 | 2016 | 1902 | 1731 | 1514 | 1240 | 974  | 704  | 485  |
| Betaproteobacteria    | Neisseriales       | <i>Chromobacterium</i> violaceum                    | 3153 | 2978 | 2780 | 2479 | 2104 | 1695 | 1303 | 898  | 579  |
| Betaproteobacteria    | Neisseriales       | <i>Neisseria</i> gonorrhoeae FA 1090                | 1673 | 1663 | 1650 | 1635 | 1621 | 1600 | 1580 | 1556 | 1536 |
| Betaproteobacteria    | Neisseriales       | <i>Neisseria</i> meningitidis 053442                | 1886 | 1887 | 1888 | 1883 | 1877 | 1860 | 1842 | 1821 | 1806 |
| Betaproteobacteria    | Neisseriales       | <i>Neisseria</i> meningitidis FAM18                 | 1791 | 1788 | 1787 | 1786 | 1788 | 1783 | 1778 | 1775 | 1768 |
| Betaproteobacteria    | Neisseriales       | <i>Neisseria</i> meningitidis MCS8                  | 1814 | 1810 | 1807 | 1804 | 1800 | 1789 | 1775 | 1758 | 1745 |
| Betaproteobacteria    | Neisseriales       | <i>Neisseria</i> meningitidis Z2491                 | 1859 | 1859 | 1865 | 1867 | 1862 | 1848 | 1838 | 1832 | 1822 |
| Betaproteobacteria    | Nitrosomonadales   | <i>Nitrosomonas</i> europaea                        | 2076 | 2072 | 2036 | 1999 | 1955 | 1892 | 1833 | 1741 | 1626 |
| Betaproteobacteria    | Nitrosomonadales   | <i>Nitrosomonas</i> eutropha C71                    | 2093 | 2065 | 2029 | 1990 | 1949 | 1879 | 1824 | 1746 | 1627 |
| Betaproteobacteria    | Nitrosomonadales   | <i>Nitrosospira</i> multiformis ATCC 25196          | 2140 | 2049 | 1951 | 1804 | 1636 | 1381 | 1147 | 852  | 578  |
| Betaproteobacteria    | Rhodocyclales      | <i>Azoarcus</i> BH72                                | 3300 | 3273 | 3194 | 2994 | 2764 | 2505 | 2179 | 1788 | 1422 |
| Betaproteobacteria    | Rhodocyclales      | <i>Azoarcus</i> sp EbN1                             | 3064 | 3066 | 2923 | 2768 | 2598 | 2383 | 2114 | 1780 | 1451 |
| Betaproteobacteria    | Rhodocyclales      | <i>Dechloromonas</i> aromatica RCB                  | 3143 | 3062 | 2900 | 2698 | 2414 | 2058 | 1628 | 1188 | 819  |
| Gammaproteobacteria   | Aeromonadales      | <i>Aeromonas</i> hydrophila ATCC 7966               | 3677 | 3711 | 3712 | 3710 | 3684 | 3618 | 3547 | 3462 | 3356 |
| Gammaproteobacteria   | Aeromonadales      | <i>Aeromonas</i> salmonicida A449                   | 3688 | 3693 | 3692 | 3667 | 3628 | 3562 | 3499 | 3418 | 3324 |
| Gammaproteobacteria   | Alteromonadales    | <i>Colwellia</i> psychroerythraea 34H               | 3217 | 3035 | 2819 | 2522 | 2199 | 1819 | 1423 | 1075 | 713  |
| Gammaproteobacteria   | Alteromonadales    | <i>Idiomarina</i> loihiensis L2TR                   | 2168 | 2044 | 1904 | 1656 | 1393 | 1121 | 870  | 635  | 426  |
| Gammaproteobacteria   | Alteromonadales    | <i>Marinobacter</i> aquaeolei VT8                   | 3069 | 2886 | 2687 | 2396 | 2100 | 1733 | 1348 | 996  | 706  |
| Gammaproteobacteria   | Alteromonadales    | <i>Pseudoalteromonas</i> atlantica T6c              | 3216 | 3011 | 2758 | 2404 | 2029 | 1651 | 1279 | 908  | 622  |
| Gammaproteobacteria   | Alteromonadales    | <i>Pseudoalteromonas</i> haloplanktis TAC125        | 2741 | 2597 | 2441 | 2177 | 1887 | 1582 | 1266 | 942  | 659  |
| Gammaproteobacteria   | Alteromonadales    | <i>Psychromonas</i> ingrahamii 37                   | 2774 | 2665 | 2489 | 2283 | 2023 | 1720 | 1373 | 1060 | 737  |
| Gammaproteobacteria   | Alteromonadales    | <i>Saccharophagus</i> degradans 2-40                | 2627 | 2373 | 2114 | 1793 | 1445 | 1119 | 836  | 578  | 377  |
| Gammaproteobacteria   | Alteromonadales    | <i>Shewanella</i> ANA-3                             | 3949 | 3966 | 3975 | 3972 | 3965 | 3950 | 3925 | 3901 | 3882 |
| Gammaproteobacteria   | Alteromonadales    | <i>Shewanella</i> MR-4                              | 3711 | 3744 | 3762 | 3779 | 3790 | 3786 | 3781 | 3783 | 3780 |
| Gammaproteobacteria   | Alteromonadales    | <i>Shewanella</i> MR-7                              | 3758 | 3789 | 3814 | 3814 | 3808 | 3800 | 3794 | 3789 | 3777 |
| Gammaproteobacteria   | Alteromonadales    | <i>Shewanella</i> W3-18-1                           | 3735 | 3750 | 3767 | 3776 | 3776 | 3755 | 3737 | 3723 | 3713 |
| Gammaproteobacteria   | Alteromonadales    | <i>Shewanella</i> amazonensis SB2B                  | 3333 | 3301 | 3234 | 3089 | 2900 | 2660 | 2391 | 2076 | 1746 |
| Gammaproteobacteria   | Alteromonadales    | <i>Shewanella</i> baltica OS155                     | 3874 | 3885 | 3894 | 3895 | 3887 | 3866 | 3839 | 3817 | 3798 |
| Gammaproteobacteria   | Alteromonadales    | <i>Shewanella</i> baltica OS185                     | 4041 | 4067 | 4095 | 4110 | 4113 | 4109 | 4100 | 4097 | 4090 |
| Gammaproteobacteria   | Alteromonadales    | <i>Shewanella</i> baltica OS195                     | 4184 | 4205 | 4222 | 4225 | 4216 | 4202 | 4191 | 4181 | 4172 |
| Gammaproteobacteria   | Alteromonadales    | <i>Shewanella</i> denitrificans OS217               | 3150 | 3097 | 3021 | 2906 | 2761 | 2595 | 2359 | 2122 | 1799 |
| Gammaproteobacteria   | Alteromonadales    | <i>Shewanella</i> frigidimarina NCIMB 400           | 3574 | 3552 | 3514 | 3415 | 3252 | 3066 | 2823 | 2544 | 2172 |
| Gammaproteobacteria   | Alteromonadales    | <i>Shewanella</i> hallifaxensis HAW EB4             | 3815 | 3841 | 3868 | 3880 | 3861 | 3827 | 3787 | 3717 | 3593 |
| Gammaproteobacteria   | Alteromonadales    | <i>Shewanella</i> loihica PV-4                      | 3523 | 3524 | 3509 | 3426 | 3302 | 3109 | 2855 | 2555 | 2231 |
| Gammaproteobacteria   | Alteromonadales    | <i>Shewanella</i> oneidensis                        | 3751 | 3759 | 3746 | 3715 | 3688 | 3651 | 3618 | 3549 | 3480 |
| Gammaproteobacteria   | Alteromonadales    | <i>Shewanella</i> pealeana ATCC 700345              | 3773 | 3809 | 3813 | 3813 | 3792 | 3763 | 3716 | 3647 | 3520 |
| Gammaproteobacteria   | Alteromonadales    | <i>Shewanella</i> putrefaciens CN-32                | 3676 | 3697 | 3726 | 3744 | 3755 | 3739 | 3735 | 3719 | 3715 |
| Gammaproteobacteria   | Alteromonadales    | <i>Shewanella</i> sediminis HAW-EB3                 | 3856 | 3850 | 3840 | 3807 | 3725 | 3587 | 3447 | 3192 | 2885 |
| Gammaproteobacteria   | Alteromonadales    | <i>Shewanella</i> woodyi ATCC 51908                 | 4097 | 4077 | 4022 | 3902 | 3798 | 3612 | 3409 | 3139 | 2793 |
| Gammaproteobacteria   | Baumanni           | <i>Baumanni</i> cicadellincola Homalodisa coagulata | 586  | 586  | 584  | 572  | 548  | 519  |      |      |      |

Networks of gene sharing among 329 proteobacterial genomes reveal differences in lateral gene transfer frequency at different phylogenetic depths  
 Thorsten Kloesges, Ovidiu Popa, William Martin, Tal Dagan

SUPPLEMENTARY MATERIAL

|                     |                   |                                                       |      |      |      |      |      |      |      |      |      |
|---------------------|-------------------|-------------------------------------------------------|------|------|------|------|------|------|------|------|------|
| Gammaproteobacteria | Chromatiales      | Alkallimnicola ehrlichei MLHE-1                       | 2348 | 2250 | 2081 | 1867 | 1607 | 1316 | 990  | 715  | 453  |
| Gammaproteobacteria | Chromatiales      | Halorhodospira halophila SL1                          | 1953 | 1859 | 1720 | 1567 | 1377 | 1120 | 845  | 602  | 377  |
| Gammaproteobacteria | Chromatiales      | Nitrosococcus oceanii ATCC 19707                      | 2227 | 2092 | 1922 | 1707 | 1409 | 1078 | 780  | 488  | 279  |
| Gammaproteobacteria | Enterobacteriales | Buchnera aphidicola                                   | 493  | 486  | 465  | 417  | 368  | 274  | 201  | 150  | 95   |
| Gammaproteobacteria | Enterobacteriales | Buchnera aphidicola Cc Clnara cedri                   | 343  | 329  | 302  | 262  | 220  | 161  | 122  | 82   | 49   |
| Gammaproteobacteria | Enterobacteriales | Buchnera aphidicola Sg                                | 544  | 542  | 539  | 531  | 520  | 499  | 462  | 387  | 316  |
| Gammaproteobacteria | Enterobacteriales | Buchnera sp.                                          | 564  | 563  | 561  | 553  | 539  | 512  | 469  | 394  | 320  |
| Gammaproteobacteria | Enterobacteriales | Candidatus Blochmannia floridanus                     | 578  | 576  | 571  | 566  | 541  | 476  | 389  | 282  | 195  |
| Gammaproteobacteria | Enterobacteriales | Candidatus Blochmannia pennsylvanicus BPEN            | 601  | 599  | 595  | 589  | 559  | 496  | 403  | 299  | 205  |
| Gammaproteobacteria | Enterobacteriales | Citrobacter koseri ATCC BAA-895                       | 3834 | 3875 | 3896 | 3905 | 3881 | 3824 | 3787 | 3706 | 3621 |
| Gammaproteobacteria | Enterobacteriales | Enterobacter 638                                      | 3719 | 3747 | 3761 | 3749 | 3735 | 3695 | 3603 | 3484 | 3305 |
| Gammaproteobacteria | Enterobacteriales | Enterobacter sakazakii ATCC BAA-894                   | 3547 | 3550 | 3520 | 3471 | 3391 | 3292 | 3135 | 2953 | 2713 |
| Gammaproteobacteria | Enterobacteriales | Erwinia carotovora atroseptica SCRI1043               | 3624 | 3630 | 3566 | 3480 | 3330 | 3144 | 2882 | 2587 | 2214 |
| Gammaproteobacteria | Enterobacteriales | Escherichia coli 536                                  | 4064 | 4107 | 4148 | 4196 | 4209 | 4220 | 4235 | 4236 | 4227 |
| Gammaproteobacteria | Enterobacteriales | Escherichia coli APEC O1                              | 4285 | 4322 | 4357 | 4391 | 4397 | 4400 | 4402 | 4384 | 4352 |
| Gammaproteobacteria | Enterobacteriales | Escherichia coli CFT073                               | 4536 | 4572 | 4618 | 4665 | 4678 | 4683 | 4695 | 4700 | 4691 |
| Gammaproteobacteria | Enterobacteriales | Escherichia coli DH10B                                | 3714 | 3758 | 3792 | 3836 | 3850 | 3873 | 3886 | 3900 | 3910 |
| Gammaproteobacteria | Enterobacteriales | Escherichia coli E24377A                              | 4241 | 4274 | 4296 | 4325 | 4321 | 4332 | 4345 | 4340 | 4337 |
| Gammaproteobacteria | Enterobacteriales | Escherichia coli HS                                   | 3948 | 3988 | 4016 | 4051 | 4061 | 4073 | 4085 | 4081 | 4076 |
| Gammaproteobacteria | Enterobacteriales | Escherichia coli K12                                  | 3804 | 3852 | 3889 | 3938 | 3954 | 3980 | 4001 | 4018 | 4031 |
| Gammaproteobacteria | Enterobacteriales | Escherichia coli O157H7                               | 4540 | 4602 | 4644 | 4694 | 4706 | 4726 | 4743 | 4760 | 4752 |
| Gammaproteobacteria | Enterobacteriales | Escherichia coli O157H7 EDL933                        | 4538 | 4603 | 4648 | 4702 | 4722 | 4745 | 4770 | 4778 | 4773 |
| Gammaproteobacteria | Enterobacteriales | Escherichia coli SECEC SMS 3 5                        | 4263 | 4306 | 4335 | 4374 | 4378 | 4392 | 4403 | 4400 | 4378 |
| Gammaproteobacteria | Enterobacteriales | Escherichia coli UTI89                                | 4671 | 4724 | 4775 | 4821 | 4843 | 4869 | 4893 | 4905 | 4906 |
| Gammaproteobacteria | Enterobacteriales | Escherichia coli W3110                                | 3867 | 3917 | 3957 | 4006 | 4024 | 4047 | 4065 | 4080 | 4090 |
| Gammaproteobacteria | Enterobacteriales | Klebsiella pneumoniae MGH 78578                       | 4182 | 4220 | 4242 | 4237 | 4199 | 4109 | 3971 | 3761 | 3502 |
| Gammaproteobacteria | Enterobacteriales | Photorhabdus luminescens                              | 3131 | 3035 | 2901 | 2775 | 2622 | 2420 | 2209 | 1941 | 1610 |
| Gammaproteobacteria | Enterobacteriales | Salmonella enterica Choleraesuis                      | 4145 | 4162 | 4187 | 4211 | 4211 | 4221 | 4226 | 4214 | 4211 |
| Gammaproteobacteria | Enterobacteriales | Salmonella enterica Paratyphi ATCC 9150               | 3838 | 3882 | 3906 | 3942 | 3954 | 3960 | 3963 | 3962 | 3960 |
| Gammaproteobacteria | Enterobacteriales | Salmonella enterica arizonae serovar 62 z4 z23        | 3714 | 3720 | 3719 | 3726 | 3707 | 3683 | 3636 | 3596 | 3558 |
| Gammaproteobacteria | Enterobacteriales | Salmonella enterica serovar Paratyphi B SPB7          | 4262 | 4295 | 4319 | 4350 | 4350 | 4333 | 4302 | 4269 | 4236 |
| Gammaproteobacteria | Enterobacteriales | Salmonella typhi                                      | 4292 | 4327 | 4356 | 4386 | 4395 | 4394 | 4400 | 4395 | 4392 |
| Gammaproteobacteria | Enterobacteriales | Salmonella typhi Ty2                                  | 4035 | 4074 | 4107 | 4146 | 4169 | 4180 | 4192 | 4204 | 4218 |
| Gammaproteobacteria | Enterobacteriales | Salmonella typhimurium LT2                            | 4147 | 4190 | 4233 | 4277 | 4289 | 4294 | 4310 | 4306 | 4301 |
| Gammaproteobacteria | Enterobacteriales | Serratia proteamaculans 568                           | 4113 | 4122 | 4079 | 4004 | 3881 | 3690 | 3440 | 3138 | 2757 |
| Gammaproteobacteria | Enterobacteriales | Shigella boydii Sb227                                 | 3479 | 3498 | 3513 | 3532 | 3542 | 3540 | 3533 | 3525 | 3508 |
| Gammaproteobacteria | Enterobacteriales | Shigella dysenteriae                                  | 3285 | 3297 | 3297 | 3310 | 3308 | 3291 | 3265 | 3245 | 3225 |
| Gammaproteobacteria | Enterobacteriales | Shigella flexneri 2a                                  | 3704 | 3731 | 3744 | 3769 | 3777 | 3793 | 3804 | 3799 | 3792 |
| Gammaproteobacteria | Enterobacteriales | Shigella flexneri 2a 2457T                            | 3482 | 3505 | 3522 | 3545 | 3554 | 3569 | 3573 | 3577 | 3577 |
| Gammaproteobacteria | Enterobacteriales | Shigella flexneri 5 8401                              | 3578 | 3593 | 3613 | 3636 | 3639 | 3652 | 3649 | 3639 | 3622 |
| Gammaproteobacteria | Enterobacteriales | Shigella sonnei Ss046                                 | 3693 | 3719 | 3744 | 3762 | 3767 | 3773 | 3784 | 3785 | 3775 |
| Gammaproteobacteria | Enterobacteriales | Sodalis glossinidius morsitans                        | 2002 | 1941 | 1895 | 1807 | 1703 | 1589 | 1465 | 1322 | 1144 |
| Gammaproteobacteria | Enterobacteriales | Wigglesworthia brevipalpis                            | 587  | 567  | 528  | 451  | 341  | 254  | 173  | 115  | 71   |
| Gammaproteobacteria | Enterobacteriales | Yersinia enterocolitica 8081                          | 3576 | 3570 | 3555 | 3529 | 3499 | 3409 | 3303 | 3197 | 3053 |
| Gammaproteobacteria | Enterobacteriales | Yersinia pestis Angola                                | 3565 | 3573 | 3589 | 3597 | 3604 | 3593 | 3586 | 3573 | 3560 |
| Gammaproteobacteria | Enterobacteriales | Yersinia pestis Antiqua                               | 3945 | 3965 | 3988 | 4005 | 4016 | 4015 | 4012 | 4002 | 3999 |
| Gammaproteobacteria | Enterobacteriales | Yersinia pestis CO92                                  | 3765 | 3783 | 3804 | 3816 | 3825 | 3833 | 3833 | 3832 | 3832 |
| Gammaproteobacteria | Enterobacteriales | Yersinia pestis KIM                                   | 3779 | 3792 | 3813 | 3826 | 3831 | 3835 | 3836 | 3831 | 3829 |
| Gammaproteobacteria | Enterobacteriales | Yersinia pestis Nepal516                              | 3812 | 3832 | 3856 | 3872 | 3883 | 3889 | 3887 | 3884 | 3884 |
| Gammaproteobacteria | Enterobacteriales | Yersinia pestis Pestoides F                           | 3816 | 3834 | 3857 | 3869 | 3876 | 3880 | 3877 | 3868 | 3863 |
| Gammaproteobacteria | Enterobacteriales | Yersinia pestis biovar Mediaevalis                    | 3861 | 3880 | 3900 | 3914 | 3922 | 3927 | 3930 | 3928 | 3926 |
| Gammaproteobacteria | Enterobacteriales | Yersinia pseudotuberculosis IP32953                   | 3788 | 3801 | 3818 | 3828 | 3827 | 3817 | 3809 | 3794 | 3781 |
| Gammaproteobacteria | Enterobacteriales | Yersinia pseudotuberculosis IP 31758                  | 3874 | 3876 | 3877 | 3870 | 3861 | 3850 | 3829 | 3811 | 3786 |
| Gammaproteobacteria | Enterobacteriales | Yersinia pseudotuberculosis YPIII                     | 3783 | 3791 | 3797 | 3803 | 3795 | 3782 | 3764 | 3743 | 3720 |
| Gammaproteobacteria | Legionellales     | Coxiella burnetii                                     | 1798 | 1808 | 1810 | 1813 | 1810 | 1799 | 1790 | 1770 | 1756 |
| Gammaproteobacteria | Legionellales     | Coxiella burnetii Duqway 7E9-12                       | 1889 | 1884 | 1864 | 1848 | 1827 | 1811 | 1781 | 1754 | 1727 |
| Gammaproteobacteria | Legionellales     | Coxiella burnetii RSA 331                             | 1787 | 1794 | 1799 | 1802 | 1800 | 1798 | 1793 | 1786 | 1780 |
| Gammaproteobacteria | Legionellales     | Legionella pneumophila Corby                          | 2838 | 2849 | 2846 | 2840 | 2830 | 2821 | 2816 | 2808 | 2779 |
| Gammaproteobacteria | Legionellales     | Legionella pneumophila Lens                           | 2716 | 2716 | 2721 | 2717 | 2703 | 2691 | 2685 | 2680 | 2673 |
| Gammaproteobacteria | Legionellales     | Legionella pneumophila Paris                          | 2852 | 2846 | 2842 | 2836 | 2832 | 2821 | 2812 | 2808 | 2795 |
| Gammaproteobacteria | Legionellales     | Legionella pneumophila Philadelphia 1                 | 2686 | 2694 | 2689 | 2697 | 2697 | 2691 | 2684 | 2679 | 2667 |
| Gammaproteobacteria | Methylocoales     | Methylococcus capsulatus Bath                         | 2164 | 2037 | 1868 | 1654 | 1411 | 1085 | 822  | 536  | 315  |
| Gammaproteobacteria | Oceanospirillales | Alcanivorax borkumensis SK2                           | 2221 | 2083 | 1927 | 1693 | 1417 | 1122 | 842  | 603  | 411  |
| Gammaproteobacteria | Oceanospirillales | Chromohalobacter salexigens DSM 3043                  | 2708 | 2584 | 2410 | 2160 | 1836 | 1464 | 1112 | 742  | 470  |
| Gammaproteobacteria | Oceanospirillales | Hahella chejuensis KCTC 2396                          | 3893 | 3621 | 3269 | 2809 | 2337 | 1824 | 1352 | 945  | 627  |
| Gammaproteobacteria | Oceanospirillales | Marinomonas MWYL1                                     | 3400 | 3263 | 3014 | 2663 | 2269 | 1863 | 1411 | 1008 | 627  |
| Gammaproteobacteria | Pasteurellales    | Actinobacillus pleuropneumoniae L20                   | 1901 | 1905 | 1903 | 1899 | 1899 | 1890 | 1880 | 1877 | 1865 |
| Gammaproteobacteria | Pasteurellales    | Actinobacillus pleuropneumoniae serovar 3 JL03        | 1876 | 1881 | 1884 | 1886 | 1883 | 1873 | 1869 | 1870 | 1860 |
| Gammaproteobacteria | Pasteurellales    | Actinobacillus succinogenes 130Z                      | 1913 | 1898 | 1882 | 1839 | 1786 | 1718 | 1613 | 1501 | 1334 |
| Gammaproteobacteria | Pasteurellales    | Haemophilus ducreyi 35000HP                           | 1368 | 1347 | 1328 | 1307 | 1284 | 1238 | 1186 | 1114 | 1018 |
| Gammaproteobacteria | Pasteurellales    | Haemophilus influenzae                                | 1579 | 1573 | 1569 | 1561 | 1553 | 1541 | 1539 | 1530 | 1514 |
| Gammaproteobacteria | Pasteurellales    | Haemophilus influenzae 86 028NP                       | 1704 | 1709 | 1705 | 1699 | 1688 | 1672 | 1663 | 1646 | 1627 |
| Gammaproteobacteria | Pasteurellales    | Haemophilus influenzae PITEE                          | 1526 | 1523 | 1522 | 1520 | 1516 | 1503 | 1503 | 1494 | 1479 |
| Gammaproteobacteria | Pasteurellales    | Haemophilus influenzae PITGG                          | 1544 | 1544 | 1540 | 1533 | 1526 | 1518 | 1512 | 1501 | 1480 |
| Gammaproteobacteria | Pasteurellales    | Haemophilus somnus 129PT                              | 1620 | 1615 | 1606 | 1590 | 1575 | 1557 | 1544 | 1527 | 1508 |
| Gammaproteobacteria | Pasteurellales    | Haemophilus somnus 2336                               | 1756 | 1746 | 1724 | 1691 | 1669 | 1637 | 1605 | 1575 | 1550 |
| Gammaproteobacteria | Pasteurellales    | Mannheimia succiniciproducens MBEL55E                 | 1908 | 1892 | 1858 | 1811 | 1757 | 1684 | 1581 | 1467 | 1283 |
| Gammaproteobacteria | Pasteurellales    | Pasteurella multocida                                 | 1823 | 1814 | 1772 | 1742 | 1687 | 1614 | 1481 | 1354 | 1150 |
| Gammaproteobacteria | Pseudomonadales   | Acinetobacter baumannii                               | 3053 | 3084 | 3100 | 3114 | 3096 | 3082 | 3064 | 3033 | 2983 |
| Gammaproteobacteria | Pseudomonadales   | Acinetobacter baumannii ATCC 17978                    | 2880 | 2901 | 2911 | 2910 | 2872 | 2826 | 2796 | 2744 | 2552 |
| Gammaproteobacteria | Pseudomonadales   | Acinetobacter baumannii SDF                           | 2325 | 2317 | 2312 | 2300 | 2280 | 2258 | 2247 | 2241 | 2232 |
| Gammaproteobacteria | Pseudomonadales   | Acinetobacter sp ADP1                                 | 2733 | 2720 | 2700 | 2639 | 2521 | 2390 | 2249 | 2036 | 1788 |
| Gammaproteobacteria | Pseudomonadales   | Pseudomonas aeruginosa                                | 4975 | 5076 | 5186 | 5269 | 5334 | 5358 | 5372 | 5375 | 5381 |
| Gammaproteobacteria | Pseudomonadales   | Pseudomonas aeruginosa PA7                            | 5161 | 5231 | 5296 | 5341 | 5360 | 5338 | 5305 | 5250 | 5185 |
| Gammaproteobacteria | Pseudomonadales   | Pseudomonas aeruginosa UCBBP-PA14                     | 5213 | 5315 | 5411 | 5481 | 5540 | 5552 | 5573 | 5563 | 5568 |
| Gammaproteobacteria | Pseudomonadales   | Pseudomonas entomophila L48                           | 4327 | 4404 | 4427 | 4423 | 4405 | 4360 | 4287 | 4163 | 4008 |
| Gammaproteobacteria | Pseudomonadales   | Pseudomonas fluorescens Pf-5                          | 5066 | 5114 | 5166 | 5122 | 5021 | 4889 | 4681 | 4431 | 4066 |
| Gammaproteobacteria | Pseudomonadales   | Pseudomonas fluorescens PfO-1                         | 4710 | 4769 | 4820 | 4801 | 4754 | 4640 | 4500 | 4307 | 3981 |
| Gammaproteobacteria | Pseudomonadales   | Pseudomonas mendocina ymp                             | 3963 | 3990 | 3962 | 3901 | 3797 | 3615 | 3380 | 3038 | 2610 |
| Gammaproteobacteria | Pseudomonadales   | Pseudomonas putida F1                                 | 4537 | 4628 | 4717 | 4763 | 4790 | 4775 | 4766 | 4740 | 4718 |
| Gammaproteobacteria | Pseudomonadales   | Pseudomonas putida GB 1                               | 4566 | 4664 | 4724 | 4737 | 4743 | 4724 | 4687 | 4642 | 4576 |
| Gammaproteobacteria | Pseudomonadales   | Pseudomonas putida KT2440                             | 4473 | 4558 | 4622 | 4658 | 4681 | 4676 | 4652 | 4611 | 4569 |
| Gammaproteobacteria | Pseudomonadales   | Pseudomonas putida W619                               | 4439 | 4506 | 4559 | 4561 | 4555 | 4522 | 4484 | 4412 | 4325 |
| Gammaproteobacteria | Pseudomonadales   | Pseudomonas stutzeri A1501                            | 3514 | 3497 | 3462 | 3379 | 3238 | 3037 | 2788 | 2463 | 2058 |
| Gammaproteobacteria | Pseudomonadales   | Pseudomonas syringae phageolicola 1448A               | 4349 | 4401 | 4427 | 4441 | 4425 | 4400 | 4369 | 4315 | 4245 |
| Gammaproteobacteria | Pseudomonadales   | Pseudomonas syringae pv B728a                         | 4456 | 4522 | 4547 | 4572 | 4576 | 4543 | 4509 | 4455 | 4386 |
| Gammaproteobacteria | Pseudomonadales   | Pseudomonas syringae tomato DC3000                    | 4494 | 4528 | 4570 | 4566 | 4554 | 4513 | 4477 | 4406 | 4309 |
| Gammaproteobacteria | Pseudomonadales   | Psychrobacter PrWf-1                                  | 2011 | 1969 | 1889 | 1792 | 1671 | 1511 | 1315 | 1117 | 880  |
| Gammaproteobacteria | Pseudomonadales   | Psychrobacter arcticum 273-4                          | 1905 | 1895 | 1879 | 1862 | 1839 | 1818 | 1801 | 1776 | 1756 |
| Gammaproteobacteria | Pseudomonadales   | Psychrobacter cryohalophilus K5                       | 2207 | 2187 | 2157 | 2125 | 2075 | 2012 | 1962 | 1899 | 1842 |
| Gammaproteobacteria | Ruthia            | Candidatus Ruthia magnifica Cm Calyptogenia magnifica | 925  | 919  | 910  | 891  | 873  | 862  | 853  | 839  | 809  |

Networks of gene sharing among 329 proteobacterial genomes reveal differences in lateral gene transfer frequency at different phylogenetic depths  
 Thorsten Kloesges, Ovidiu Popa, William Martin, Tal Dagan

SUPPLEMENTARY MATERIAL

|                             |                 |                                          |      |      |      |      |      |      |      |      |      |
|-----------------------------|-----------------|------------------------------------------|------|------|------|------|------|------|------|------|------|
| Gammaproteobacteria         | Thiotrichales   | Francisella philomiragia ATCC 25017      | 1619 | 1596 | 1572 | 1546 | 1517 | 1472 | 1432 | 1366 | 1304 |
| Gammaproteobacteria         | Thiotrichales   | Francisella tularensis FSC 198           | 1509 | 1516 | 1523 | 1525 | 1527 | 1529 | 1529 | 1530 | 1530 |
| Gammaproteobacteria         | Thiotrichales   | Francisella tularensis WY96-3418         | 1527 | 1528 | 1537 | 1539 | 1541 | 1542 | 1542 | 1540 | 1539 |
| Gammaproteobacteria         | Thiotrichales   | Francisella tularensis holarctica        | 1557 | 1557 | 1557 | 1552 | 1548 | 1534 | 1517 | 1504 | 1497 |
| Gammaproteobacteria         | Thiotrichales   | Francisella tularensis holarctica FTA    | 1465 | 1466 | 1473 | 1476 | 1477 | 1477 | 1477 | 1475 | 1472 |
| Gammaproteobacteria         | Thiotrichales   | Francisella tularensis holarctica OSU18  | 1443 | 1445 | 1452 | 1454 | 1456 | 1457 | 1454 | 1451 | 1449 |
| Gammaproteobacteria         | Thiotrichales   | Francisella tularensis novidda U112      | 1615 | 1608 | 1614 | 1606 | 1595 | 1589 | 1583 | 1573 | 1561 |
| Gammaproteobacteria         | Thiotrichales   | Francisella tularensis tularensis        | 1507 | 1515 | 1521 | 1523 | 1525 | 1527 | 1527 | 1528 | 1528 |
| Gammaproteobacteria         | Thiotrichales   | Thiomicrospira crunogena XCL-2           | 1656 | 1524 | 1357 | 1127 | 905  | 685  | 466  | 309  | 180  |
| Gammaproteobacteria         | Vesicomysocius  | Candidatus Vesicomysocius okutanii HA    | 901  | 895  | 888  | 878  | 866  | 859  | 847  | 834  | 807  |
| Gammaproteobacteria         | Vibrionales     | Photobacterium profundum SS9             | 3846 | 3733 | 3556 | 3329 | 3064 | 2740 | 2400 | 1984 | 1575 |
| Gammaproteobacteria         | Vibrionales     | Vibrio cholerae                          | 3352 | 3376 | 3385 | 3401 | 3400 | 3404 | 3399 | 3393 | 3379 |
| Gammaproteobacteria         | Vibrionales     | Vibrio cholerae O395                     | 3431 | 3451 | 3453 | 3456 | 3446 | 3445 | 3438 | 3425 | 3401 |
| Gammaproteobacteria         | Vibrionales     | Vibrio fischeri ES114                    | 3132 | 3069 | 2977 | 2823 | 2642 | 2419 | 2153 | 1837 | 1518 |
| Gammaproteobacteria         | Vibrionales     | Vibrio Harveyi ATCC BAA-1116             | 3994 | 3946 | 3891 | 3831 | 3755 | 3665 | 3571 | 3457 | 3304 |
| Gammaproteobacteria         | Vibrionales     | Vibrio parahaemolyticus                  | 3985 | 3999 | 4000 | 3978 | 3921 | 3846 | 3746 | 3612 | 3431 |
| Gammaproteobacteria         | Vibrionales     | Vibrio vulnificus CMCP6                  | 3952 | 3967 | 3959 | 3947 | 3928 | 3895 | 3861 | 3825 | 3789 |
| Gammaproteobacteria         | Vibrionales     | Vibrio vulnificus YJ016                  | 4052 | 4078 | 4064 | 4059 | 4046 | 4012 | 3966 | 3923 | 3879 |
| Gammaproteobacteria         | Xanthomonadales | Xanthomonas campestris                   | 3945 | 3967 | 3997 | 4019 | 4027 | 4034 | 4037 | 4033 | 4027 |
| Gammaproteobacteria         | Xanthomonadales | Xanthomonas campestris 8004              | 3975 | 4005 | 4033 | 4059 | 4062 | 4062 | 4063 | 4048 | 4037 |
| Gammaproteobacteria         | Xanthomonadales | Xanthomonas campestris vesicatoria 85-10 | 3918 | 3920 | 3929 | 3935 | 3923 | 3890 | 3847 | 3799 | 3736 |
| Gammaproteobacteria         | Xanthomonadales | Xanthomonas citri                        | 3841 | 3852 | 3850 | 3843 | 3811 | 3773 | 3734 | 3679 | 3627 |
| Gammaproteobacteria         | Xanthomonadales | Xanthomonas oryzae KACC10331             | 3438 | 3449 | 3455 | 3463 | 3459 | 3446 | 3431 | 3405 | 3371 |
| Gammaproteobacteria         | Xanthomonadales | Xanthomonas oryzae MAFF 311018           | 3629 | 3618 | 3618 | 3617 | 3603 | 3585 | 3561 | 3534 | 3510 |
| Gammaproteobacteria         | Xanthomonadales | Xylella fastidiosa                       | 2156 | 2146 | 2125 | 2098 | 2075 | 2039 | 2020 | 1989 | 1950 |
| Gammaproteobacteria         | Xanthomonadales | Xylella fastidiosa M12                   | 1939 | 1938 | 1936 | 1923 | 1911 | 1893 | 1878 | 1859 | 1835 |
| Gammaproteobacteria         | Xanthomonadales | Xylella fastidiosa Temecula1             | 1918 | 1913 | 1904 | 1901 | 1893 | 1884 | 1883 | 1866 | 1840 |
| Unclassified Proteobacteria | Magnetococcus   | Magnetococcus MC-1                       | 1946 | 1714 | 1437 | 1142 | 860  | 596  | 380  | 209  | 98   |



SUPPLEMENTARY MATERIAL

Table S5: Recent LGT estimated for the total Proteobacteria

| Class               | Order            | Species                                           | genome size | # recent | % recent |
|---------------------|------------------|---------------------------------------------------|-------------|----------|----------|
| Alphaproteobacteria | Caulobacterales  | Caulobacter crescentus                            | 3,230       | 255      | 7.89%    |
| Alphaproteobacteria | Caulobacterales  | Caulobacter K31                                   | 4,543       | 742      | 16.33%   |
| Alphaproteobacteria | Rhizobiales      | Agrobacterium tumefaciens C58 Cereon              | 4,728       | 768      | 16.24%   |
| Alphaproteobacteria | Rhizobiales      | Azorhizobium caulinodans ORS 571                  | 4,264       | 561      | 13.16%   |
| Alphaproteobacteria | Rhizobiales      | Bartonella bacilliformis KC583                    | 1,105       | 35       | 3.17%    |
| Alphaproteobacteria | Rhizobiales      | Bartonella henselae Houston-1                     | 1,384       | 21       | 1.52%    |
| Alphaproteobacteria | Rhizobiales      | Bartonella quintana Toulouse                      | 1,124       | 23       | 2.05%    |
| Alphaproteobacteria | Rhizobiales      | Bartonella tribocorum CIP 105476                  | 1,557       | 81       | 5.20%    |
| Alphaproteobacteria | Rhizobiales      | Bradyrhizobium BTAi1                              | 6,929       | 470      | 6.78%    |
| Alphaproteobacteria | Rhizobiales      | Bradyrhizobium japonicum                          | 6,893       | 942      | 13.67%   |
| Alphaproteobacteria | Rhizobiales      | Bradyrhizobium ORS278                             | 6,069       | 318      | 5.24%    |
| Alphaproteobacteria | Rhizobiales      | Brucella abortus 9-941                            | 3,078       | 72       | 2.34%    |
| Alphaproteobacteria | Rhizobiales      | Brucella canis ATCC 23365                         | 3,205       | 461      | 14.38%   |
| Alphaproteobacteria | Rhizobiales      | Brucella melitensis                               | 3,101       | 98       | 3.16%    |
| Alphaproteobacteria | Rhizobiales      | Brucella melitensis biovar Abortus                | 3,026       | 47       | 1.55%    |
| Alphaproteobacteria | Rhizobiales      | Brucella ovis                                     | 2,758       | 66       | 2.39%    |
| Alphaproteobacteria | Rhizobiales      | Brucella suis 1330                                | 3,245       | 460      | 14.18%   |
| Alphaproteobacteria | Rhizobiales      | Brucella suis ATCC 23445                          | 3,193       | 527      | 16.50%   |
| Alphaproteobacteria | Rhizobiales      | Mesorhizobium BNC1                                | 3,975       | 653      | 16.43%   |
| Alphaproteobacteria | Rhizobiales      | Mesorhizobium loti                                | 5,800       | 1,355    | 23.36%   |
| Alphaproteobacteria | Rhizobiales      | Methylobacterium 4 46                             | 5,431       | 852      | 15.69%   |
| Alphaproteobacteria | Rhizobiales      | Methylobacterium extorquens PA1                   | 4,256       | 322      | 7.57%    |
| Alphaproteobacteria | Rhizobiales      | Methylobacterium radiotolerans JCM 2831           | 5,265       | 648      | 12.31%   |
| Alphaproteobacteria | Rhizobiales      | Nitrobacter hamburgensis X14                      | 3,657       | 537      | 14.68%   |
| Alphaproteobacteria | Rhizobiales      | Nitrobacter winogradskyi Nb-255                   | 2,748       | 185      | 6.73%    |
| Alphaproteobacteria | Rhizobiales      | Ochrobactrum anthropi ATCC 49188                  | 4,401       | 735      | 16.70%   |
| Alphaproteobacteria | Rhizobiales      | Parvibaculum lavamentivorans DS-1                 | 3,082       | 853      | 27.68%   |
| Alphaproteobacteria | Rhizobiales      | Rhizobium etli CFN 42                             | 5,477       | 309      | 5.64%    |
| Alphaproteobacteria | Rhizobiales      | Rhizobium leguminosarum bv viciae 3841            | 6,388       | 655      | 10.25%   |
| Alphaproteobacteria | Rhizobiales      | Rhodopseudomonas palustris BisA53                 | 4,460       | 379      | 8.50%    |
| Alphaproteobacteria | Rhizobiales      | Rhodopseudomonas palustris BisB18                 | 4,499       | 357      | 7.94%    |
| Alphaproteobacteria | Rhizobiales      | Rhodopseudomonas palustris BisB5                  | 4,179       | 354      | 8.47%    |
| Alphaproteobacteria | Rhizobiales      | Rhodopseudomonas palustris CGA009                 | 4,610       | 321      | 6.96%    |
| Alphaproteobacteria | Rhizobiales      | Rhodopseudomonas palustris HaA2                   | 4,488       | 334      | 7.44%    |
| Alphaproteobacteria | Rhizobiales      | Sinorhizobium medicae WSM419                      | 5,681       | 373      | 6.57%    |
| Alphaproteobacteria | Rhizobiales      | Sinorhizobium meliloti                            | 5,628       | 288      | 5.12%    |
| Alphaproteobacteria | Rhizobiales      | Xanthobacter autotrophicus Py2                    | 4,376       | 715      | 16.34%   |
| Alphaproteobacteria | Rhodobacterales  | Dinoroseobacter shibae DFL 12                     | 3,662       | 774      | 21.14%   |
| Alphaproteobacteria | Rhodobacterales  | Hyphomonas neptunium ATCC 15444                   | 2,730       | 535      | 19.60%   |
| Alphaproteobacteria | Rhodobacterales  | Jannaschia CCS1                                   | 3,536       | 696      | 19.68%   |
| Alphaproteobacteria | Rhodobacterales  | Maricaulis maris MCS10                            | 2,350       | 512      | 21.79%   |
| Alphaproteobacteria | Rhodobacterales  | Paracoccus denitrificans PD1222                   | 4,310       | 878      | 20.37%   |
| Alphaproteobacteria | Rhodobacterales  | Rhodobacter sphaeroides 2 4 1                     | 4,032       | 177      | 4.39%    |
| Alphaproteobacteria | Rhodobacterales  | Rhodobacter sphaeroides ATCC 17025                | 3,816       | 388      | 10.17%   |
| Alphaproteobacteria | Rhodobacterales  | Rhodobacter sphaeroides ATCC 17029                | 3,966       | 160      | 4.03%    |
| Alphaproteobacteria | Rhodobacterales  | Roseobacter denitrificans OCH 114                 | 3,511       | 529      | 15.07%   |
| Alphaproteobacteria | Rhodobacterales  | Silicibacter pomeroyi DSS-3                       | 3,836       | 507      | 13.22%   |
| Alphaproteobacteria | Rhodobacterales  | Silicibacter TM1040                               | 3,373       | 349      | 10.35%   |
| Alphaproteobacteria | Rhodospirillales | Acidiphiliumcryptum JF-5                          | 2,900       | 858      | 29.59%   |
| Alphaproteobacteria | Rhodospirillales | Gluconacetobacter diazotrophicus PAI 5            | 3,018       | 631      | 20.91%   |
| Alphaproteobacteria | Rhodospirillales | Gluconobacter oxydans 621H                        | 2,088       | 269      | 12.88%   |
| Alphaproteobacteria | Rhodospirillales | Granulobacter bethedensis CGDNIH1                 | 2,053       | 463      | 22.55%   |
| Alphaproteobacteria | Rhodospirillales | Magnetospirillum magneticum AMB-1                 | 3,048       | 869      | 28.51%   |
| Alphaproteobacteria | Rhodospirillales | Rhodospirillum rubrum ATCC 11170                  | 3,175       | 992      | 31.24%   |
| Alphaproteobacteria | Rickettsiales    | Anaplasma marginale St Maries                     | 765         | 16       | 2.09%    |
| Alphaproteobacteria | Rickettsiales    | Anaplasma phagocytophilum HZ                      | 735         | 15       | 2.04%    |
| Alphaproteobacteria | Rickettsiales    | Candidatus Pelagibacter ubique HTCC1062           | 1,016       | 374      | 36.81%   |
| Alphaproteobacteria | Rickettsiales    | Ehrlichia canis Jake                              | 813         | 4        | 0.49%    |
| Alphaproteobacteria | Rickettsiales    | Ehrlichia chaffeensis Arkansas                    | 815         | 7        | 0.86%    |
| Alphaproteobacteria | Rickettsiales    | Ehrlichia ruminantium Gardel                      | 924         | 39       | 4.22%    |
| Alphaproteobacteria | Rickettsiales    | Ehrlichia ruminantium str. Welgevonden            | 927         | 39       | 4.21%    |
| Alphaproteobacteria | Rickettsiales    | Ehrlichia ruminantium str. Welgevonden            | 886         | 1        | 0.11%    |
| Alphaproteobacteria | Rickettsiales    | Neorickettsia sennetsu Miyayama                   | 530         | 38       | 7.17%    |
| Alphaproteobacteria | Rickettsiales    | Orientia tsutsugamushi Boryong                    | 629         | 67       | 10.65%   |
| Alphaproteobacteria | Rickettsiales    | Rickettsia akari Hartford                         | 1,010       | 85       | 8.42%    |
| Alphaproteobacteria | Rickettsiales    | Rickettsia bellii OSU 85-389                      | 1,320       | 24       | 1.82%    |
| Alphaproteobacteria | Rickettsiales    | Rickettsia bellii RML369-C                        | 1,346       | 44       | 3.27%    |
| Alphaproteobacteria | Rickettsiales    | Rickettsia canadensis McKiel                      | 847         | 104      | 12.28%   |
| Alphaproteobacteria | Rickettsiales    | Rickettsia conorii                                | 1,252       | 126      | 10.06%   |
| Alphaproteobacteria | Rickettsiales    | Rickettsia felis URRWXCal2                        | 1,250       | 221      | 17.68%   |
| Alphaproteobacteria | Rickettsiales    | Rickettsia massiliae MTU5                         | 955         | 58       | 6.07%    |
| Alphaproteobacteria | Rickettsiales    | Rickettsia prowazekii                             | 810         | 7        | 0.86%    |
| Alphaproteobacteria | Rickettsiales    | Rickettsia rickettsii Iowa                        | 1,293       | 48       | 3.71%    |
| Alphaproteobacteria | Rickettsiales    | Rickettsia rickettsii Sheila Smith                | 1,276       | 31       | 2.43%    |
| Alphaproteobacteria | Rickettsiales    | Rickettsia typhi wilmington                       | 815         | 18       | 2.21%    |
| Alphaproteobacteria | Rickettsiales    | Wolbachia endosymbiont of Brugia malayi TRS       | 672         | 9        | 1.34%    |
| Alphaproteobacteria | Rickettsiales    | Wolbachia endosymbiont of Drosophila melanogaster | 793         | 72       | 9.08%    |
| Alphaproteobacteria | Sphingomonadales | Erythrobacter litoralis HTCC2594                  | 2,483       | 359      | 14.46%   |
| Alphaproteobacteria | Sphingomonadales | Novosphingobium aromaticivorans DSM 12444         | 3,258       | 775      | 23.79%   |
| Alphaproteobacteria | Sphingomonadales | Sphingomonas wittichii RW1                        | 4,123       | 1,378    | 33.42%   |
| Alphaproteobacteria | Sphingomonadales | Sphingopyxis alaskensis RB2256                    | 2,742       | 800      | 29.18%   |

Networks of gene sharing among 329 proteobacterial genomes reveal differences in lateral gene transfer frequency at different phylogenetic depths  
 Thorsten Kloesges, Ovidiu Popa, William Martin, Tal Dagan

SUPPLEMENTARY MATERIAL

|                       |                     |                                          |       |       |        |
|-----------------------|---------------------|------------------------------------------|-------|-------|--------|
| Alphaproteobacteria   | Sphingomonadales    | Zymomonas mobilis ZM4                    | 1,466 | 194   | 13.23% |
| Betaproteobacteria    | Burkholderiales     | Acidovorax avenae citrulli AAC00-1       | 3,999 | 645   | 16.13% |
| Betaproteobacteria    | Burkholderiales     | Acidovorax JS42                          | 3,823 | 418   | 10.93% |
| Betaproteobacteria    | Burkholderiales     | Bordetella bronchiseptica                | 4,830 | 256   | 5.30%  |
| Betaproteobacteria    | Burkholderiales     | Bordetella parapertussis                 | 4,146 | 22    | 0.53%  |
| Betaproteobacteria    | Burkholderiales     | Bordetella pertussis                     | 3,213 | 135   | 4.20%  |
| Betaproteobacteria    | Burkholderiales     | Bordetella petrii                        | 4,620 | 698   | 15.11% |
| Betaproteobacteria    | Burkholderiales     | Burkholderia 383                         | 7,207 | 771   | 10.70% |
| Betaproteobacteria    | Burkholderiales     | Burkholderia cenocepacia AU 1054         | 6,428 | 13    | 0.20%  |
| Betaproteobacteria    | Burkholderiales     | Burkholderia cenocepacia H12424          | 6,791 | 104   | 1.53%  |
| Betaproteobacteria    | Burkholderiales     | Burkholderia cenocepacia MCO 3           | 6,836 | 652   | 9.54%  |
| Betaproteobacteria    | Burkholderiales     | Burkholderia cepacia AMMD                | 6,265 | 414   | 6.61%  |
| Betaproteobacteria    | Burkholderiales     | Burkholderia mallei ATCC 23344           | 4,475 | 175   | 3.91%  |
| Betaproteobacteria    | Burkholderiales     | Burkholderia mallei NCTC 10229           | 5,248 | 481   | 9.17%  |
| Betaproteobacteria    | Burkholderiales     | Burkholderia mallei NCTC 10247           | 5,577 | 933   | 16.73% |
| Betaproteobacteria    | Burkholderiales     | Burkholderia mallei SAVP1                | 4,940 | 492   | 9.96%  |
| Betaproteobacteria    | Burkholderiales     | Burkholderia multivorans ATCC 17616      | 5,908 | 710   | 12.02% |
| Betaproteobacteria    | Burkholderiales     | Burkholderia pseudomallei 1106a          | 6,696 | 1,488 | 22.22% |
| Betaproteobacteria    | Burkholderiales     | Burkholderia pseudomallei 1710b          | 5,596 | 645   | 11.53% |
| Betaproteobacteria    | Burkholderiales     | Burkholderia pseudomallei 668            | 6,657 | 1,304 | 19.59% |
| Betaproteobacteria    | Burkholderiales     | Burkholderia pseudomallei K96243         | 5,609 | 183   | 3.26%  |
| Betaproteobacteria    | Burkholderiales     | Burkholderia thailandensis E264          | 5,252 | 765   | 14.57% |
| Betaproteobacteria    | Burkholderiales     | Burkholderia vietnamiensis G4            | 6,337 | 722   | 11.39% |
| Betaproteobacteria    | Burkholderiales     | Burkholderia xenovorans LB400            | 7,262 | 1,358 | 18.70% |
| Betaproteobacteria    | Burkholderiales     | Delftia acidovorans SPH-1                | 5,267 | 968   | 18.38% |
| Betaproteobacteria    | Burkholderiales     | Hermiimonas arsenicoxidans               | 2,934 | 173   | 5.90%  |
| Betaproteobacteria    | Burkholderiales     | Janthinobacterium Marseille              | 3,434 | 358   | 10.43% |
| Betaproteobacteria    | Burkholderiales     | Leptothrix cholodnii SP 6                | 3,808 | 554   | 14.55% |
| Betaproteobacteria    | Burkholderiales     | Methylobium petroleiphilum PM1           | 3,682 | 529   | 14.37% |
| Betaproteobacteria    | Burkholderiales     | Polaromonas JS666                        | 4,714 | 706   | 14.98% |
| Betaproteobacteria    | Burkholderiales     | Polaromonas naphthalenivorans CJ2        | 4,202 | 597   | 14.21% |
| Betaproteobacteria    | Burkholderiales     | Polynucleobacter necessarius STIR1       | 1,242 | 21    | 1.69%  |
| Betaproteobacteria    | Burkholderiales     | Polynucleobacter QLW-P1DMWA-1            | 1,877 | 127   | 6.77%  |
| Betaproteobacteria    | Burkholderiales     | Ralstonia eutropha H16                   | 6,173 | 545   | 8.83%  |
| Betaproteobacteria    | Burkholderiales     | Ralstonia eutropha JMP134                | 6,055 | 531   | 8.77%  |
| Betaproteobacteria    | Burkholderiales     | Ralstonia metallidurans CH34             | 5,644 | 724   | 12.83% |
| Betaproteobacteria    | Burkholderiales     | Ralstonia solanacearum                   | 4,228 | 694   | 16.41% |
| Betaproteobacteria    | Burkholderiales     | Rhodoferrax ferrireducens T118           | 3,866 | 618   | 15.99% |
| Betaproteobacteria    | Burkholderiales     | Verminephrobacter eiseniae EF01-2        | 4,078 | 1,012 | 24.82% |
| Betaproteobacteria    | Hydrogenophilales   | Thiobacillus denitrificans ATCC 25259    | 2,378 | 492   | 20.69% |
| Betaproteobacteria    | Methylophilales     | Methylobacillus flagellatus KT           | 2,348 | 426   | 18.14% |
| Betaproteobacteria    | Neisseriales        | Chromobacterium violaceum                | 3,468 | 1,324 | 38.18% |
| Betaproteobacteria    | Neisseriales        | Neisseria gonorrhoeae FA 1090            | 1,740 | 241   | 13.85% |
| Betaproteobacteria    | Neisseriales        | Neisseria meningitidis 053442            | 1,963 | 193   | 9.83%  |
| Betaproteobacteria    | Neisseriales        | Neisseria meningitidis FAM18             | 1,868 | 118   | 6.32%  |
| Betaproteobacteria    | Neisseriales        | Neisseria meningitidis MC58              | 1,916 | 200   | 10.44% |
| Betaproteobacteria    | Neisseriales        | Neisseria meningitidis Z2491             | 1,917 | 254   | 13.25% |
| Betaproteobacteria    | Nitrosomonadales    | Nitrosomonas europaea                    | 2,235 | 229   | 10.25% |
| Betaproteobacteria    | Nitrosomonadales    | Nitrosomonas eutropha C71                | 2,259 | 203   | 8.99%  |
| Betaproteobacteria    | Nitrosomonadales    | Nitrospirilla multiformis ATCC 25196     | 2,296 | 394   | 17.16% |
| Betaproteobacteria    | Rhodocyclales       | Azoarcus BH72                            | 3,644 | 696   | 19.10% |
| Betaproteobacteria    | Rhodocyclales       | Azoarcus sp EbN1                         | 3,519 | 729   | 20.72% |
| Betaproteobacteria    | Rhodocyclales       | Dechloromonas aromatica RCB              | 3,563 | 860   | 24.14% |
| Deltaproteobacteria   | Bdellovibrionales   | Bdellovibrio bacteriovorus               | 1,534 | 864   | 56.32% |
| Deltaproteobacteria   | Desulfobacterales   | Candidatus Desulfococcus oleovorans Hxd3 | 2,050 | 778   | 37.95% |
| Deltaproteobacteria   | Desulfobacterales   | Desulfotalea psychrophila L5v54          | 2,073 | 1,677 | 80.90% |
| Deltaproteobacteria   | Desulfovibrionales  | Desulfovibrio desulfuricans G20          | 2,757 | 1,289 | 46.75% |
| Deltaproteobacteria   | Desulfovibrionales  | Desulfovibrio vulgaris DP4               | 2,958 | 106   | 3.58%  |
| Deltaproteobacteria   | Desulfovibrionales  | Desulfovibrio vulgaris Hildenborough     | 2,951 | 119   | 4.03%  |
| Deltaproteobacteria   | Desulfovibrionales  | Lawsonia intracellularis PHE MN1-00      | 1,043 | 129   | 12.37% |
| Deltaproteobacteria   | Desulfuromonadales  | Geobacter metallireducens GS-15          | 3,099 | 547   | 17.65% |
| Deltaproteobacteria   | Desulfuromonadales  | Geobacter sulfurreducens                 | 2,972 | 455   | 15.31% |
| Deltaproteobacteria   | Desulfuromonadales  | Geobacter uraniumreducens Rf4            | 3,473 | 1,136 | 32.71% |
| Deltaproteobacteria   | Desulfuromonadales  | Pelobacter carbinolicus                  | 2,476 | 916   | 37.00% |
| Deltaproteobacteria   | Desulfuromonadales  | Pelobacter propionicus DSM 2379          | 2,917 | 684   | 23.45% |
| Deltaproteobacteria   | Myxococcales        | Anaeromyxobacter dehalogenans 2CP-C      | 3,739 | 424   | 11.34% |
| Deltaproteobacteria   | Myxococcales        | Anaeromyxobacter Fw109-5                 | 3,744 | 477   | 12.74% |
| Deltaproteobacteria   | Myxococcales        | Myxococcus xanthus DK 1622               | 3,768 | 1,577 | 41.85% |
| Deltaproteobacteria   | Myxococcales        | Sorangium cellulosum So ce 56            | 3,690 | 2,042 | 55.34% |
| Deltaproteobacteria   | Syntrophobacterales | Syntrophobacter fumaroxidans MPOB        | 2,587 | 1,124 | 43.45% |
| Deltaproteobacteria   | Syntrophobacterales | Syntrophus aciditrophicus SB             | 1,894 | 633   | 33.42% |
| Epsilonproteobacteria | Campylobacterales   | Arcobacter butzleri RM4018               | 1,720 | 732   | 42.56% |
| Epsilonproteobacteria | Campylobacterales   | Campylobacter concisus 13826             | 1,578 | 158   | 10.01% |
| Epsilonproteobacteria | Campylobacterales   | Campylobacter curvus 525 92              | 1,627 | 161   | 9.90%  |
| Epsilonproteobacteria | Campylobacterales   | Campylobacter fetus 82-40                | 1,493 | 295   | 19.76% |
| Epsilonproteobacteria | Campylobacterales   | Campylobacter hominis ATCC BAA-381       | 1,190 | 133   | 11.18% |
| Epsilonproteobacteria | Campylobacterales   | Campylobacter jejuni                     | 1,584 | 151   | 9.53%  |
| Epsilonproteobacteria | Campylobacterales   | Campylobacter jejuni 81-176              | 1,581 | 100   | 6.33%  |
| Epsilonproteobacteria | Campylobacterales   | Campylobacter jejuni 81116               | 1,631 | 51    | 3.13%  |
| Epsilonproteobacteria | Campylobacterales   | Campylobacter jejuni doylei 269 97       | 1,539 | 147   | 9.55%  |
| Epsilonproteobacteria | Campylobacterales   | Campylobacter jejuni RM1221              | 1,621 | 269   | 16.59% |
| Epsilonproteobacteria | Campylobacterales   | Helicobacter acinonychis Sheeba          | 1,333 | 74    | 5.55%  |

Networks of gene sharing among 329 proteobacterial genomes reveal differences in lateral gene transfer frequency at different phylogenetic depths  
 Thorsten Kloesges, Ovidiu Popa, William Martin, Tal Dagan

SUPPLEMENTARY MATERIAL

|                       |                    |                                                       |       |       |        |
|-----------------------|--------------------|-------------------------------------------------------|-------|-------|--------|
| Epsilonproteobacteria | Campylobacteriales | <i>Helicobacter hepaticus</i>                         | 1,301 | 347   | 26.67% |
| Epsilonproteobacteria | Campylobacteriales | <i>Helicobacter pylori</i> 26695                      | 1,459 | 51    | 3.50%  |
| Epsilonproteobacteria | Campylobacteriales | <i>Helicobacter pylori</i> HPAG1                      | 1,456 | 47    | 3.23%  |
| Epsilonproteobacteria | Campylobacteriales | <i>Helicobacter pylori</i> J99                        | 1,430 | 71    | 4.97%  |
| Epsilonproteobacteria | Campylobacteriales | <i>Thiomicrospira denitrificans</i> ATCC 33889        | 1,659 | 452   | 27.25% |
| Epsilonproteobacteria | Campylobacteriales | <i>Wolinella succinogenes</i>                         | 1,659 | 801   | 48.28% |
| Epsilonproteobacteria | Nitratiruptor      | <i>Nitratiruptor</i> SB155-2                          | 1,464 | 1,006 | 68.72% |
| Epsilonproteobacteria | Sulfurovum         | <i>Sulfurovum</i> NBC37-1                             | 1,794 | 546   | 30.43% |
| Gammaproteobacteria   | Aeromonadales      | <i>Aeromonas hydrophila</i> ATCC 7966                 | 3,939 | 180   | 4.57%  |
| Gammaproteobacteria   | Aeromonadales      | <i>Aeromonas salmonicida</i> A449                     | 3,978 | 251   | 6.31%  |
| Gammaproteobacteria   | Alteromonadales    | <i>Colwellia psychrerythraea</i> 34H                  | 3,586 | 662   | 18.46% |
| Gammaproteobacteria   | Alteromonadales    | <i>Idiomarina loihiensis</i> L2TR                     | 2,263 | 231   | 10.21% |
| Gammaproteobacteria   | Alteromonadales    | <i>Marinobacter aquaeolei</i> VT8                     | 3,454 | 468   | 13.55% |
| Gammaproteobacteria   | Alteromonadales    | <i>Pseudoalteromonas atlantica</i> T6c                | 3,492 | 659   | 18.87% |
| Gammaproteobacteria   | Alteromonadales    | <i>Pseudoalteromonas haloplanktis</i> TAC125          | 2,880 | 390   | 13.54% |
| Gammaproteobacteria   | Alteromonadales    | <i>Psychromonas ingrahamii</i> 37                     | 2,995 | 617   | 20.60% |
| Gammaproteobacteria   | Alteromonadales    | <i>Saccharophagus degradans</i> 2-40                  | 2,819 | 687   | 24.37% |
| Gammaproteobacteria   | Alteromonadales    | <i>Shewanella amazonensis</i> SB2B                    | 3,471 | 573   | 16.51% |
| Gammaproteobacteria   | Alteromonadales    | <i>Shewanella</i> ANA-3                               | 4,151 | 236   | 5.69%  |
| Gammaproteobacteria   | Alteromonadales    | <i>Shewanella baltica</i> OS155                       | 4,199 | 157   | 3.74%  |
| Gammaproteobacteria   | Alteromonadales    | <i>Shewanella baltica</i> OS185                       | 4,283 | 336   | 7.84%  |
| Gammaproteobacteria   | Alteromonadales    | <i>Shewanella baltica</i> OS195                       | 4,475 | 364   | 8.13%  |
| Gammaproteobacteria   | Alteromonadales    | <i>Shewanella denitrificans</i> OS217                 | 3,336 | 339   | 10.16% |
| Gammaproteobacteria   | Alteromonadales    | <i>Shewanella frigidimarina</i> NCIMB 400             | 3,811 | 422   | 11.07% |
| Gammaproteobacteria   | Alteromonadales    | <i>Shewanella halifaxensis</i> HAW EB4                | 4,112 | 230   | 5.59%  |
| Gammaproteobacteria   | Alteromonadales    | <i>Shewanella loihica</i> PV-4                        | 3,683 | 483   | 13.11% |
| Gammaproteobacteria   | Alteromonadales    | <i>Shewanella</i> MR-4                                | 3,879 | 106   | 2.73%  |
| Gammaproteobacteria   | Alteromonadales    | <i>Shewanella</i> MR-7                                | 3,915 | 161   | 4.11%  |
| Gammaproteobacteria   | Alteromonadales    | <i>Shewanella oneidensis</i>                          | 3,967 | 334   | 8.42%  |
| Gammaproteobacteria   | Alteromonadales    | <i>Shewanella pealeana</i> ATCC 700345                | 4,024 | 196   | 4.87%  |
| Gammaproteobacteria   | Alteromonadales    | <i>Shewanella putrefaciens</i> CN-32                  | 3,899 | 108   | 2.77%  |
| Gammaproteobacteria   | Alteromonadales    | <i>Shewanella sediminis</i> HAW-EB3                   | 4,183 | 441   | 10.54% |
| Gammaproteobacteria   | Alteromonadales    | <i>Shewanella</i> W3-18-1                             | 3,913 | 151   | 3.86%  |
| Gammaproteobacteria   | Alteromonadales    | <i>Shewanella woodyi</i> ATCC 51908                   | 4,352 | 557   | 12.80% |
| Gammaproteobacteria   | Baumannia          | <i>Baumannia cicadellincola</i> Homalodisca coagulata | 587   | 10    | 1.70%  |
| Gammaproteobacteria   | Cardiobacteriales  | <i>Dichelobacter nodosus</i> VCS1703A                 | 988   | 147   | 14.88% |
| Gammaproteobacteria   | Carsonella         | <i>Candidatus Carsonella ruddii</i> PV                | 80    | 1     | 1.25%  |
| Gammaproteobacteria   | Chromatiales       | <i>Alkalilimnicola ehrlichei</i> MLHE-1               | 2,492 | 427   | 17.13% |
| Gammaproteobacteria   | Chromatiales       | <i>Halorhodospira halophila</i> SL1                   | 2,042 | 255   | 12.49% |
| Gammaproteobacteria   | Chromatiales       | <i>Nitrosococcus oceani</i> ATCC 19707                | 2,364 | 692   | 29.27% |
| Gammaproteobacteria   | Enterobacteriales  | <i>Buchnera aphidicola</i>                            | 494   | 11    | 2.23%  |
| Gammaproteobacteria   | Enterobacteriales  | <i>Buchnera aphidicola</i> Cc Cinar cedri             | 343   | 2     | 0.58%  |
| Gammaproteobacteria   | Enterobacteriales  | <i>Buchnera aphidicola</i> Sg                         | 544   | 0     | 0.00%  |
| Gammaproteobacteria   | Enterobacteriales  | <i>Buchnera</i> sp                                    | 566   | 2     | 0.35%  |
| Gammaproteobacteria   | Enterobacteriales  | <i>Candidatus Blochmannia floridanus</i>              | 579   | 1     | 0.17%  |
| Gammaproteobacteria   | Enterobacteriales  | <i>Candidatus Blochmannia pennsylvanicus</i> BPEN     | 602   | 1     | 0.17%  |
| Gammaproteobacteria   | Enterobacteriales  | <i>Citrobacter koseri</i> ATCC BAA-895                | 4,194 | 521   | 12.42% |
| Gammaproteobacteria   | Enterobacteriales  | <i>Enterobacter</i> 638                               | 4,059 | 613   | 15.10% |
| Gammaproteobacteria   | Enterobacteriales  | <i>Enterobacter sakazakii</i> ATCC BAA-894            | 3,812 | 480   | 12.59% |
| Gammaproteobacteria   | Enterobacteriales  | <i>Erwinia carotovora</i> atroseptica SCRI1043        | 4,018 | 681   | 16.95% |
| Gammaproteobacteria   | Enterobacteriales  | <i>Escherichia coli</i> 536                           | 4,461 | 129   | 2.89%  |
| Gammaproteobacteria   | Enterobacteriales  | <i>Escherichia coli</i> APEC O1                       | 4,739 | 355   | 7.49%  |
| Gammaproteobacteria   | Enterobacteriales  | <i>Escherichia coli</i> CFT073                        | 5,045 | 548   | 10.86% |
| Gammaproteobacteria   | Enterobacteriales  | <i>Escherichia coli</i> DH10B                         | 4,092 | 42    | 1.03%  |
| Gammaproteobacteria   | Enterobacteriales  | <i>Escherichia coli</i> E24377A                       | 4,656 | 385   | 8.27%  |
| Gammaproteobacteria   | Enterobacteriales  | <i>Escherichia coli</i> HS                            | 4,217 | 304   | 7.21%  |
| Gammaproteobacteria   | Enterobacteriales  | <i>Escherichia coli</i> K12                           | 4,100 | 21    | 0.51%  |
| Gammaproteobacteria   | Enterobacteriales  | <i>Escherichia coli</i> O157H7                        | 5,091 | 98    | 1.92%  |
| Gammaproteobacteria   | Enterobacteriales  | <i>Escherichia coli</i> O157H7 EDL933                 | 5,167 | 95    | 1.84%  |
| Gammaproteobacteria   | Enterobacteriales  | <i>Escherichia coli</i> SECEC SMS 3 5                 | 4,668 | 382   | 8.18%  |
| Gammaproteobacteria   | Enterobacteriales  | <i>Escherichia coli</i> UTI89                         | 5,072 | 549   | 10.82% |
| Gammaproteobacteria   | Enterobacteriales  | <i>Escherichia coli</i> W3110                         | 4,180 | 45    | 1.08%  |
| Gammaproteobacteria   | Enterobacteriales  | <i>Klebsiella pneumoniae</i> MGH 78578                | 4,808 | 651   | 13.54% |
| Gammaproteobacteria   | Enterobacteriales  | <i>Photobacterium luminescens</i>                     | 3,495 | 724   | 20.72% |
| Gammaproteobacteria   | Enterobacteriales  | <i>Salmonella enterica</i> arizonae serovar 62 z4 z23 | 3,985 | 360   | 9.03%  |
| Gammaproteobacteria   | Enterobacteriales  | <i>Salmonella enterica</i> Choleraesuis               | 4,434 | 377   | 8.50%  |
| Gammaproteobacteria   | Enterobacteriales  | <i>Salmonella enterica</i> Paratyphi ATCC 9150        | 4,069 | 187   | 4.60%  |
| Gammaproteobacteria   | Enterobacteriales  | <i>Salmonella enterica</i> serovar Paratyphi B SPB7   | 4,553 | 313   | 6.87%  |
| Gammaproteobacteria   | Enterobacteriales  | <i>Salmonella typhi</i>                               | 4,618 | 216   | 4.68%  |
| Gammaproteobacteria   | Enterobacteriales  | <i>Salmonella typhi</i> Ty2                           | 4,289 | 8     | 0.19%  |
| Gammaproteobacteria   | Enterobacteriales  | <i>Salmonella typhimurium</i> LT2                     | 4,472 | 166   | 3.71%  |
| Gammaproteobacteria   | Enterobacteriales  | <i>Serratia proteamaculans</i> 568                    | 4,590 | 658   | 14.34% |
| Gammaproteobacteria   | Enterobacteriales  | <i>Shigella boydii</i> Sb227                          | 3,753 | 207   | 5.52%  |
| Gammaproteobacteria   | Enterobacteriales  | <i>Shigella dysenteriae</i>                           | 3,554 | 295   | 8.30%  |
| Gammaproteobacteria   | Enterobacteriales  | <i>Shigella flexneri</i> 2a                           | 4,055 | 227   | 5.60%  |
| Gammaproteobacteria   | Enterobacteriales  | <i>Shigella flexneri</i> 2a 2457T                     | 3,742 | 92    | 2.46%  |
| Gammaproteobacteria   | Enterobacteriales  | <i>Shigella flexneri</i> 5 8401                       | 3,820 | 124   | 3.25%  |
| Gammaproteobacteria   | Enterobacteriales  | <i>Shigella sonnei</i> Ss046                          | 3,959 | 235   | 5.94%  |
| Gammaproteobacteria   | Enterobacteriales  | <i>Sodalis glossinidius</i> morsitans                 | 2,121 | 242   | 11.41% |
| Gammaproteobacteria   | Enterobacteriales  | <i>Wigglesworthia brevialpilis</i>                    | 588   | 23    | 3.91%  |
| Gammaproteobacteria   | Enterobacteriales  | <i>Yersinia enterocolitica</i> 8081                   | 3,801 | 402   | 10.58% |
| Gammaproteobacteria   | Enterobacteriales  | <i>Yersinia pestis</i> Angola                         | 3,692 | 198   | 5.36%  |

Networks of gene sharing among 329 proteobacterial genomes reveal differences in lateral gene transfer frequency at different phylogenetic depths  
 Thorsten Kloesges, Ovidiu Popa, William Martin, Tal Dagan

SUPPLEMENTARY MATERIAL

|                             |                   |                                                             |       |       |        |
|-----------------------------|-------------------|-------------------------------------------------------------|-------|-------|--------|
| Gammaproteobacteria         | Enterobacteriales | <i>Yersinia pestis</i> Antiqua                              | 4,107 | 138   | 3.36%  |
| Gammaproteobacteria         | Enterobacteriales | <i>Yersinia pestis</i> biovar Mediaevalis                   | 3,987 | 127   | 3.19%  |
| Gammaproteobacteria         | Enterobacteriales | <i>Yersinia pestis</i> CO92                                 | 3,879 | 45    | 1.16%  |
| Gammaproteobacteria         | Enterobacteriales | <i>Yersinia pestis</i> KIM                                  | 3,893 | 117   | 3.01%  |
| Gammaproteobacteria         | Enterobacteriales | <i>Yersinia pestis</i> Nepal516                             | 3,942 | 91    | 2.31%  |
| Gammaproteobacteria         | Enterobacteriales | <i>Yersinia pestis</i> Pestoides F                          | 3,942 | 445   | 11.29% |
| Gammaproteobacteria         | Enterobacteriales | <i>Yersinia pseudotuberculosis</i> IP 31758                 | 3,947 | 568   | 14.39% |
| Gammaproteobacteria         | Enterobacteriales | <i>Yersinia pseudotuberculosis</i> IP32953                  | 4,023 | 395   | 9.82%  |
| Gammaproteobacteria         | Enterobacteriales | <i>Yersinia pseudotuberculosis</i> YPIII                    | 3,907 | 257   | 6.58%  |
| Gammaproteobacteria         | Legionellales     | <i>Coxiella burnetii</i>                                    | 1,848 | 115   | 6.22%  |
| Gammaproteobacteria         | Legionellales     | <i>Coxiella burnetii</i> Dugway 7E9-12                      | 1,943 | 280   | 14.41% |
| Gammaproteobacteria         | Legionellales     | <i>Coxiella burnetii</i> RSA 331                            | 1,820 | 125   | 6.87%  |
| Gammaproteobacteria         | Legionellales     | <i>Legionella pneumophila</i> Corby                         | 2,990 | 316   | 10.57% |
| Gammaproteobacteria         | Legionellales     | <i>Legionella pneumophila</i> Lens                          | 2,813 | 173   | 6.15%  |
| Gammaproteobacteria         | Legionellales     | <i>Legionella pneumophila</i> Paris                         | 2,990 | 351   | 11.74% |
| Gammaproteobacteria         | Legionellales     | <i>Legionella pneumophila</i> Philadelphia 1                | 2,784 | 148   | 5.32%  |
| Gammaproteobacteria         | Methylococcales   | <i>Methylococcus capsulatus</i> Bath                        | 2,307 | 814   | 35.28% |
| Gammaproteobacteria         | Oceanospirillales | <i>Alcanivorax borkumensis</i> SK2                          | 2,339 | 346   | 14.79% |
| Gammaproteobacteria         | Oceanospirillales | <i>Chromohalobacter salexigenis</i> DSM 3043                | 2,918 | 500   | 17.14% |
| Gammaproteobacteria         | Oceanospirillales | <i>Hahella chejuensis</i> KCTC 2396                         | 4,345 | 975   | 22.44% |
| Gammaproteobacteria         | Oceanospirillales | <i>Marinomonas</i> MWV1                                     | 3,811 | 832   | 21.83% |
| Gammaproteobacteria         | Pasteurellales    | <i>Actinobacillus pleuropneumoniae</i> L20                  | 1,973 | 41    | 2.08%  |
| Gammaproteobacteria         | Pasteurellales    | <i>Actinobacillus pleuropneumoniae</i> serovar 3 J103       | 1,947 | 34    | 1.75%  |
| Gammaproteobacteria         | Pasteurellales    | <i>Actinobacillus succinogenes</i> 130Z                     | 2,004 | 140   | 6.99%  |
| Gammaproteobacteria         | Pasteurellales    | <i>Haemophilus ducreyi</i> 35000HP                          | 1,410 | 214   | 15.18% |
| Gammaproteobacteria         | Pasteurellales    | <i>Haemophilus influenzae</i>                               | 1,621 | 81    | 5.00%  |
| Gammaproteobacteria         | Pasteurellales    | <i>Haemophilus influenzae</i> 86 028NP                      | 1,741 | 120   | 6.89%  |
| Gammaproteobacteria         | Pasteurellales    | <i>Haemophilus influenzae</i> PittEE                        | 1,550 | 52    | 3.35%  |
| Gammaproteobacteria         | Pasteurellales    | <i>Haemophilus influenzae</i> PittGG                        | 1,572 | 136   | 8.65%  |
| Gammaproteobacteria         | Pasteurellales    | <i>Haemophilus somnus</i> 129PT                             | 1,664 | 39    | 2.34%  |
| Gammaproteobacteria         | Pasteurellales    | <i>Haemophilus somnus</i> 2336                              | 1,815 | 104   | 5.73%  |
| Gammaproteobacteria         | Pasteurellales    | <i>Mannheimia succiniciproducens</i> MBEL55E                | 2,001 | 122   | 6.10%  |
| Gammaproteobacteria         | Pasteurellales    | <i>Pasteurella multocida</i>                                | 1,879 | 152   | 8.09%  |
| Gammaproteobacteria         | Pseudomonadales   | <i>Acinetobacter baumannii</i>                              | 3,360 | 233   | 6.93%  |
| Gammaproteobacteria         | Pseudomonadales   | <i>Acinetobacter baumannii</i> ATCC 17978                   | 3,173 | 114   | 3.59%  |
| Gammaproteobacteria         | Pseudomonadales   | <i>Acinetobacter baumannii</i> SDF                          | 2,465 | 210   | 8.52%  |
| Gammaproteobacteria         | Pseudomonadales   | <i>Acinetobacter</i> sp ADP1                                | 2,948 | 365   | 12.38% |
| Gammaproteobacteria         | Pseudomonadales   | <i>Pseudomonas aeruginosa</i>                               | 5,518 | 46    | 0.83%  |
| Gammaproteobacteria         | Pseudomonadales   | <i>Pseudomonas aeruginosa</i> PA7                           | 5,757 | 320   | 5.56%  |
| Gammaproteobacteria         | Pseudomonadales   | <i>Pseudomonas aeruginosa</i> UCBPP-PA14                    | 5,760 | 168   | 2.92%  |
| Gammaproteobacteria         | Pseudomonadales   | <i>Pseudomonas entomophila</i> L48                          | 4,778 | 452   | 9.46%  |
| Gammaproteobacteria         | Pseudomonadales   | <i>Pseudomonas fluorescens</i> Pf-5                         | 5,741 | 799   | 13.92% |
| Gammaproteobacteria         | Pseudomonadales   | <i>Pseudomonas fluorescens</i> PfO-1                        | 5,339 | 705   | 13.20% |
| Gammaproteobacteria         | Pseudomonadales   | <i>Pseudomonas mendocina</i> ymp                            | 4,329 | 472   | 10.90% |
| Gammaproteobacteria         | Pseudomonadales   | <i>Pseudomonas putida</i> F1                                | 5,092 | 201   | 3.95%  |
| Gammaproteobacteria         | Pseudomonadales   | <i>Pseudomonas putida</i> GB 1                              | 5,162 | 349   | 6.76%  |
| Gammaproteobacteria         | Pseudomonadales   | <i>Pseudomonas putida</i> KT2440                            | 5,029 | 218   | 4.33%  |
| Gammaproteobacteria         | Pseudomonadales   | <i>Pseudomonas putida</i> W619                              | 4,956 | 395   | 7.97%  |
| Gammaproteobacteria         | Pseudomonadales   | <i>Pseudomonas stutzeri</i> A1501                           | 3,837 | 448   | 11.68% |
| Gammaproteobacteria         | Pseudomonadales   | <i>Pseudomonas syringae</i> phaseolicola 1448A              | 4,788 | 256   | 5.35%  |
| Gammaproteobacteria         | Pseudomonadales   | <i>Pseudomonas syringae</i> pv B728a                        | 4,866 | 361   | 7.42%  |
| Gammaproteobacteria         | Pseudomonadales   | <i>Pseudomonas syringae</i> tomato DC3000                   | 4,935 | 323   | 6.55%  |
| Gammaproteobacteria         | Pseudomonadales   | <i>Psychrobacter arcticum</i> 273-4                         | 1,971 | 70    | 3.55%  |
| Gammaproteobacteria         | Pseudomonadales   | <i>Psychrobacter cryohalolentis</i> K5                      | 2,331 | 168   | 7.21%  |
| Gammaproteobacteria         | Pseudomonadales   | <i>Psychrobacter</i> PRwf-1                                 | 2,109 | 188   | 8.91%  |
| Gammaproteobacteria         | Ruthia            | <i>Candidatus Ruthia magnifica</i> Cm Calyptogena magnifica | 931   | 15    | 1.61%  |
| Gammaproteobacteria         | Thiotrichales     | <i>Francisella philomiragia</i> ATCC 25017                  | 1,693 | 267   | 15.77% |
| Gammaproteobacteria         | Thiotrichales     | <i>Francisella tularensis</i> FSC 198                       | 1,553 | 0     | 0.00%  |
| Gammaproteobacteria         | Thiotrichales     | <i>Francisella tularensis</i> holarctica                    | 1,635 | 140   | 8.56%  |
| Gammaproteobacteria         | Thiotrichales     | <i>Francisella tularensis</i> holarctica FTA                | 1,515 | 68    | 4.49%  |
| Gammaproteobacteria         | Thiotrichales     | <i>Francisella tularensis</i> holarctica OSU18              | 1,486 | 51    | 3.43%  |
| Gammaproteobacteria         | Thiotrichales     | <i>Francisella tularensis</i> novicida U112                 | 1,661 | 265   | 15.95% |
| Gammaproteobacteria         | Thiotrichales     | <i>Francisella tularensis</i> tularensis                    | 1,551 | 0     | 0.00%  |
| Gammaproteobacteria         | Thiotrichales     | <i>Francisella tularensis</i> WY96-3418                     | 1,552 | 70    | 4.51%  |
| Gammaproteobacteria         | Thiotrichales     | <i>Thiomicrospira crunogena</i> XCL-2                       | 1,719 | 401   | 23.33% |
| Gammaproteobacteria         | Vesicomysocius    | <i>Candidatus Vesicomysocius okutanii</i> HA                | 904   | 19    | 2.10%  |
| Gammaproteobacteria         | Vibrionales       | <i>Photobacterium profundum</i> SS9                         | 4,333 | 905   | 20.89% |
| Gammaproteobacteria         | Vibrionales       | <i>Vibrio cholerae</i>                                      | 3,520 | 44    | 1.25%  |
| Gammaproteobacteria         | Vibrionales       | <i>Vibrio cholerae</i> O395                                 | 3,578 | 70    | 1.96%  |
| Gammaproteobacteria         | Vibrionales       | <i>Vibrio fischeri</i> ES114                                | 3,359 | 491   | 14.62% |
| Gammaproteobacteria         | Vibrionales       | <i>Vibrio harveyi</i> ATCC BAA-1116                         | 4,308 | 359   | 8.33%  |
| Gammaproteobacteria         | Vibrionales       | <i>Vibrio parahaemolyticus</i>                              | 4,240 | 286   | 6.75%  |
| Gammaproteobacteria         | Vibrionales       | <i>Vibrio vulnificus</i> CMCP6                              | 4,178 | 129   | 3.09%  |
| Gammaproteobacteria         | Vibrionales       | <i>Vibrio vulnificus</i> YJ016                              | 4,266 | 205   | 4.81%  |
| Gammaproteobacteria         | Xanthomonadales   | <i>Xanthomonas campestris</i>                               | 4,117 | 483   | 11.73% |
| Gammaproteobacteria         | Xanthomonadales   | <i>Xanthomonas campestris</i> 8004                          | 4,171 | 460   | 11.03% |
| Gammaproteobacteria         | Xanthomonadales   | <i>Xanthomonas campestris</i> vesicatoria 85-10             | 4,189 | 374   | 8.93%  |
| Gammaproteobacteria         | Xanthomonadales   | <i>Xanthomonas citri</i>                                    | 4,022 | 323   | 8.03%  |
| Gammaproteobacteria         | Xanthomonadales   | <i>Xanthomonas oryzae</i> KACC10331                         | 3,625 | 29    | 0.80%  |
| Gammaproteobacteria         | Xanthomonadales   | <i>Xanthomonas oryzae</i> MAFF 311018                       | 3,759 | 123   | 3.27%  |
| Gammaproteobacteria         | Xanthomonadales   | <i>Xylella fastidiosa</i>                                   | 2,317 | 372   | 16.06% |
| Gammaproteobacteria         | Xanthomonadales   | <i>Xylella fastidiosa</i> M12                               | 2,018 | 175   | 8.67%  |
| Gammaproteobacteria         | Xanthomonadales   | <i>Xylella fastidiosa</i> Temecula1                         | 1,951 | 146   | 7.48%  |
| unclassified Proteobacteria | Magnetococcus     | <i>Magnetococcus</i> MC-1                                   | 2,232 | 1,280 | 57.35% |
